# Supplementary material
Source: publisher figshare collection journal article supplement (https://gsajournals.figshare.com/articles/dataset/_/7624559)
Supplement: Supplementary file 1 [file 1]

## Sheet: smFISH Data
Strain	Genotype	Sample	Batch	Gonad Length (pixels)	mRNAs
CEW1	wild type	1	1	156.12	13
CEW1	wild type	2	1	394.325	8
CEW1	wild type	7	1	352.428	13
CEW1	wild type	15	1	303.305	11
CEW1	wild type	16	1	273.354	12
CEW1	wild type	18	1	358.857	15
CEW1	wild type	20	1	357.937	12
CEW1	wild type	25	1	322.989	6
CEW1	wild type	26	1	321.271	5
CEW1	wild type	27	1	269.561	10
CEW1	wild type	29	1	258.385	4
CEW1	wild type	31	1	287.261	4
CEW1	wild type	32	1	274.328	13
CEW1	wild type	33	1	339.888	11
CEW1	wild type	34	1	324.392	7
CEW1	wild type	36	1	326.381	10
CEW1	wild type	39	1	351.596	14
CEW1	wild type	43	1	340.167	10
CEW1	wild type	48	1	341.478	7
CEW1	wild type	49	1	299.612	4
CEW1	wild type	50	1	274.008	9
CEW1	wild type	51	1	314.421	5
CEW1	wild type	74	1	298.636	5
CEW1	wild type	75	1	239.974	12
CEW1	wild type	88	1	363.133	8
CEW1	wild type	90	1	415.539	5
CEW1	wild type	1	2	776.566	17
CEW1	wild type	9	2	789.433	15
CEW1	wild type	17	2	1066.99	24
CEW1	wild type	18	2	1004.2	25
CEW1	wild type	27	2	689.682	15
CEW1	wild type	50	2	792.1	16
CEW1	wild type	51	2	853.172	16
CEW1	wild type	67	2	1279.52	16
CEW1	wild type	68	2	940.085	14
CEW1	wild type	71	2	749.728	16
CEW1	wild type	1	3	1242.83	11
CEW1	wild type	2	3	949.331	19
CEW1	wild type	3	3	513.526	9
CEW1	wild type	4	3	747.661	17
CEW1	wild type	6	3	282.622	19
CEW1	wild type	8	3	833.721	26
CEW1	wild type	10	3	886.066	22
CEW1	wild type	11	3	492.957	11
CEW1	wild type	16	3	599.903	18
CEW1	wild type	17	3	877.457	10
CEW1	wild type	19	3	965.029	15
CEW1	wild type	22	3	358.504	14
CEW1	wild type	23	3	868.057	17
CEW1	wild type	26	3	1086.31	14
CEW1	wild type	27	3	747.727	18
CEW1	wild type	28	3	1157.33	22
CEW1	wild type	29	3	861.923	16
CEW1	wild type	32	3	1045.58	25
CEW1	wild type	33	3	880.398	14
CEW1	wild type	37	3	622.231	22
CEW1	wild type	40	3	808.42	16
JU162	Oti-lin-3(mf86)	2	1	373.224	1
JU162	Oti-lin-3(mf86)	3	1	653.141	0
JU162	Oti-lin-3(mf86)	4	1	375.181	0
JU162	Oti-lin-3(mf86)	5	1	245.724	1
JU162	Oti-lin-3(mf86)	7	1	257.871	2
JU162	Oti-lin-3(mf86)	11	1	205.836	0
JU162	Oti-lin-3(mf86)	13	1	359.805	3
JU162	Oti-lin-3(mf86)	15	1	228.755	0
JU162	Oti-lin-3(mf86)	18	1	544.68	0
JU162	Oti-lin-3(mf86)	19	1	230.521	0
JU162	Oti-lin-3(mf86)	20	1	243.851	1
JU162	Oti-lin-3(mf86)	23	1	647.645	0
JU162	Oti-lin-3(mf86)	25	1	283.283	0
JU162	Oti-lin-3(mf86)	26	1	269.865	0
JU162	Oti-lin-3(mf86)	27	1	296.698	1
JU162	Oti-lin-3(mf86)	28	1	241.369	0
JU162	Oti-lin-3(mf86)	29	1	282.083	0
JU162	Oti-lin-3(mf86)	30	1	291.88	0
JU162	Oti-lin-3(mf86)	32	1	241	0
JU162	Oti-lin-3(mf86)	33	1	512.899	0
JU162	Oti-lin-3(mf86)	34	1	428.597	1
JU162	Oti-lin-3(mf86)	36	1	293.908	0
JU162	Oti-lin-3(mf86)	37	1	333.612	0
JU162	Oti-lin-3(mf86)	38	1	279.341	1
JU162	Oti-lin-3(mf86)	39	1	257.762	0
JU162	Oti-lin-3(mf86)	40	1	353.658	0
JU162	Oti-lin-3(mf86)	41	1	324.205	0
JU162	Oti-lin-3(mf86)	43	1	411.623	0
JU162	Oti-lin-3(mf86)	44	1	232.353	2
JU162	Oti-lin-3(mf86)	46	1	363.822	4
JU162	Oti-lin-3(mf86)	47	1	340.53	2
JU162	Oti-lin-3(mf86)	48	1	348.531	0
JU162	Oti-lin-3(mf86)	51	1	288.461	0
JU162	Oti-lin-3(mf86)	52	1	288.382	0
JU162	Oti-lin-3(mf86)	53	1	234.137	1
JU162	Oti-lin-3(mf86)	54	1	495.801	0
JU162	Oti-lin-3(mf86)	55	1	335.863	0
JU162	Oti-lin-3(mf86)	56	1	252.098	0
JU162	Oti-lin-3(mf86)	57	1	358.104	3
JU162	Oti-lin-3(mf86)	58	1	358.03	2
JU162	Oti-lin-3(mf86)	59	1	259.297	0
JU162	Oti-lin-3(mf86)	60	1	250.688	0
JU162	Oti-lin-3(mf86)	61	1	318.373	0
JU162	Oti-lin-3(mf86)	62	1	315.381	0
JU162	Oti-lin-3(mf86)	65	1	314.307	1
JU162	Oti-lin-3(mf86)	69	1	454.261	1
JU162	Oti-lin-3(mf86)	70	1	305.969	1
JU162	Oti-lin-3(mf86)	71	1	253.183	1
JU162	Oti-lin-3(mf86)	72	1	339.236	0
JU3175	Oti-lin-3(mf113)	2	1	478.49	2
JU3175	Oti-lin-3(mf113)	3	1	765.385	1
JU3175	Oti-lin-3(mf113)	4	1	474.757	0
JU3175	Oti-lin-3(mf113)	6	1	687.693	3
JU3175	Oti-lin-3(mf113)	9	1	556.314	0
JU3175	Oti-lin-3(mf113)	12	1	1013.25	1
JU3175	Oti-lin-3(mf113)	13	1	454.714	3
JU3175	Oti-lin-3(mf113)	15	1	785.676	7
JU3175	Oti-lin-3(mf113)	18	1	1063.98	0
JU3175	Oti-lin-3(mf113)	19	1	1013.64	1
JU3175	Oti-lin-3(mf113)	21	1	470.7	0
JU3175	Oti-lin-3(mf113)	23	1	575.076	2
JU3175	Oti-lin-3(mf113)	29	1	475.587	0
JU3175	Oti-lin-3(mf113)	30	1	690.468	1
JU3175	Oti-lin-3(mf113)	31	1	788.478	1
JU3175	Oti-lin-3(mf113)	32	1	348.485	2
JU3175	Oti-lin-3(mf113)	33	1	728.91	1
JU3175	Oti-lin-3(mf113)	34	1	625.763	3
JU3175	Oti-lin-3(mf113)	37	1	334.168	1
JU3175	Oti-lin-3(mf113)	40	1	746.101	4
JU3175	Oti-lin-3(mf113)	41	1	234.649	0
JU3175	Oti-lin-3(mf113)	43	1	582.368	0
JU3175	Oti-lin-3(mf113)	4	2	221.177	0
JU3175	Oti-lin-3(mf113)	12	2	275.945	0
JU3175	Oti-lin-3(mf113)	16	2	350.032	0
smFISH quantifications along AP-Axis
Each row is an animal and each column is the number of mRNA quantified in a section of the worm from the anterior to the posterior (e.g. 0 to .01, .01 to .02, ....0.99 to 1)
Oti-mom-2
0	0	0	0	0	0	0	0	0	0	0	0	0	0	0	0	0	0	0	0	0	0	0	0	0	0	0	0	0	0	0	0	3	1	1	1	4	2	0	3	0	1	0	0	0	0	0	0	0	0
0	0	0	0	0	0	0	0	0	0	0	0	0	0	0	0	0	0	0	0	0	0	0	0	0	0	0	0	0	0	0	0	0	4	4	1	1	0	1	1	0	0	0	0	0	0	0	0	0	0
0	0	0	0	0	0	0	0	0	0	0	0	0	0	0	0	0	0	0	0	0	0	0	0	0	0	0	0	0	0	0	0	0	0	0	0	1	0	2	1	0	4	5	3	4	1	1	1	1	1
0	0	0	0	0	0	0	0	0	0	0	0	0	0	0	0	0	0	1	0	0	0	0	0	0	0	0	0	0	0	0	0	0	1	0	3	1	3	2	5	5	4	1	2	0	2	2	0	0	0
0	0	0	0	0	0	0	0	0	0	0	0	0	0	0	0	0	0	0	0	0	0	0	0	0	0	0	0	0	0	0	0	0	2	0	1	2	6	1	2	0	1	0	0	0	0	0	0	0	0
0	0	0	0	0	0	0	0	0	0	0	0	0	0	0	0	0	0	0	0	0	0	0	0	0	0	0	0	0	0	0	0	0	0	0	0	2	0	2	0	1	0	0	0	1	0	0	0	0	0
0	0	0	0	0	0	0	0	0	0	0	0	0	0	0	0	0	0	0	0	0	0	0	0	0	0	0	0	0	0	0	0	0	0	0	2	5	1	5	4	1	0	0	0	0	0	0	0	0	0
0	0	0	0	0	0	0	0	0	0	0	0	0	0	0	0	0	0	0	0	0	0	0	0	0	0	0	0	0	0	0	0	3	2	1	2	1	0	0	0	0	0	0	0	0	0	0	0	0	0
0	0	0	0	0	0	0	0	0	0	0	0	0	0	0	0	0	0	0	0	0	0	0	0	0	0	0	0	0	0	0	2	0	0	1	8	3	2	1	2	0	0	0	0	0	0	0	0	0	0
0	0	0	0	0	0	0	0	0	0	0	0	0	0	0	0	0	0	0	0	0	0	0	0	0	0	0	0	0	0	0	0	0	0	2	1	0	2	2	0	2	1	0	0	0	0	0	0	0	0
0	0	0	0	0	0	0	0	0	0	0	0	0	0	0	0	0	0	0	0	0	0	0	0	0	0	0	0	0	0	0	0	0	0	1	4	2	2	0	1	0	0	0	0	0	0	0	0	0	0
0	0	0	0	0	0	0	0	0	0	0	0	0	0	0	0	0	0	0	0	0	0	0	0	0	0	0	0	0	1	1	0	4	2	2	0	2	0	0	0	0	0	0	0	0	0	0	0	0	0
0	0	0	0	1	0	0	0	0	0	0	0	0	0	0	0	0	0	0	0	0	0	0	0	0	0	0	0	1	0	0	1	0	0	0	1	3	4	1	0	0	0	1	1	0	1	0	0	0	0
0	0	0	0	0	0	0	0	0	0	0	0	0	0	0	0	0	0	0	0	0	0	0	0	0	0	0	0	0	0	0	0	0	2	1	1	0	0	0	0	0	0	0	0	0	0	0	0	0	0
0	0	0	0	0	0	0	1	0	0	0	0	0	0	0	0	0	0	0	0	0	0	0	0	0	0	0	0	0	0	0	0	0	0	0	0	1	0	1	1	1	1	0	1	0	0	0	0	0	0
0	0	0	0	0	1	1	0	0	0	0	0	0	0	0	0	0	0	1	0	0	0	0	0	0	0	0	0	0	0	0	0	1	2	2	2	3	1	0	0	0	0	0	0	0	1	0	0	0	0
0	0	0	0	0	0	0	0	0	0	0	0	0	0	0	0	0	0	0	0	0	0	0	0	1	2	0	1	1	1	3	7	6	0	0	0	1	0	0	0	0	0	0	0	0	0	0	0	0	0
0	0	0	0	0	0	0	0	0	0	0	0	0	0	0	0	0	0	0	0	0	0	0	0	0	0	0	0	0	0	2	5	3	11	3	2	1	2	0	0	0	0	0	0	0	0	0	0	0	0
0	0	0	0	0	0	0	0	0	0	0	0	0	0	0	0	0	0	0	0	0	0	0	0	0	0	0	0	0	0	0	0	0	0	0	1	3	3	4	3	1	8	0	3	1	0	0	0	0	0
0	0	1	1	0	0	0	0	0	0	0	0	0	0	0	0	0	0	0	0	0	0	1	0	0	0	0	0	0	0	0	0	0	0	0	1	2	5	2	3	3	3	0	0	0	0	0	0	0	0
Oti-lin-44
0	0	0	0	0	0	0	0	0	0	0	0	0	0	0	0	0	0	0	0	0	0	0	0	0	0	0	0	0	0	0	0	0	0	0	0	0	0	0	0	0	0	0	0	0	0	0	0	0	0
2	0	0	0	0	0	0	0	0	0	0	0	0	0	0	1	0	0	0	0	0	0	0	0	0	0	1	0	0	0	0	0	0	0	0	0	0	0	0	0	0	0	0	0	0	0	0	0	0	0
0	0	0	0	0	0	0	0	0	0	0	0	0	0	0	0	0	0	0	0	0	0	0	0	0	0	0	0	0	0	0	0	0	0	0	0	0	0	0	0	0	0	0	0	0	0	0	0	0	0
0	0	0	0	0	0	0	0	0	0	0	0	0	0	0	0	0	0	0	0	0	0	0	0	0	0	0	0	0	0	0	0	0	0	0	1	0	1	1	0	0	0	0	0	0	0	0	0	0	0
0	0	1	0	0	0	0	0	0	0	0	0	0	0	0	0	0	0	0	0	0	0	0	0	0	0	0	0	0	0	0	0	0	0	0	0	1	0	0	0	0	0	0	0	0	0	0	0	0	0
0	0	0	0	0	0	0	0	0	0	0	0	0	0	0	0	0	0	0	0	0	0	0	0	0	0	0	0	0	0	0	0	0	0	0	0	0	0	0	0	0	0	0	0	0	0	0	0	0	0
0	0	0	0	0	0	0	0	0	0	0	0	0	0	0	0	0	0	0	0	0	0	0	0	0	0	0	0	0	0	0	0	0	0	0	0	0	0	0	0	0	0	0	0	0	0	0	0	0	0
0	0	0	0	0	0	0	0	1	1	0	0	0	0	0	0	0	0	0	0	0	0	0	0	0	0	0	0	0	0	0	0	0	0	0	0	0	0	0	0	1	1	0	0	0	0	0	0	0	0
0	0	1	0	0	0	0	0	0	0	0	0	0	0	0	0	0	1	0	0	0	0	0	0	0	0	0	0	0	0	0	0	0	0	0	0	0	0	0	0	0	0	0	0	0	0	0	0	1	0
0	0	0	1	1	0	0	0	0	1	1	0	0	0	0	0	0	0	0	0	0	0	0	1	1	0	0	0	0	0	0	0	0	0	0	0	0	0	0	0	0	0	0	0	0	0	0	0	0	0
1	0	2	1	1	2	0	1	0	1	1	1	1	2	1	1	3	1	4	1	3	2	1	1	0	3	0	0	5	1	0	2	3	3	1	1	2	0	2	1	1	4	1	2	0	1	2	0	1	0
0	0	0	0	0	0	0	0	0	0	0	0	0	0	1	0	0	0	0	0	0	0	0	0	0	0	0	0	0	0	1	0	0	0	0	0	0	0	0	0	0	0	0	0	0	0	0	0	0	0
0	0	0	0	0	0	0	0	0	0	0	0	0	0	0	0	0	0	0	0	0	0	0	0	0	0	0	0	0	0	0	0	0	1	0	1	0	0	0	0	0	0	0	0	0	0	0	0	0	0
0	0	0	0	0	0	0	0	0	0	0	0	0	0	0	0	0	0	0	0	0	0	0	0	0	0	0	0	0	0	0	0	0	0	0	0	0	0	0	0	0	0	0	0	0	0	0	0	0	0
0	0	0	0	0	0	0	0	0	0	0	0	0	0	0	0	0	0	0	0	0	0	0	0	0	0	0	0	0	0	0	0	0	0	0	0	0	0	0	0	0	0	0	0	0	0	0	0	0	0
0	0	0	0	0	0	0	0	0	0	0	0	0	0	0	0	0	0	0	0	0	0	0	3	0	0	0	0	0	0	0	0	0	0	0	0	0	0	1	3	1	1	2	0	0	0	0	0	0	0
0	0	0	0	0	0	0	0	0	0	0	0	0	0	0	0	0	0	0	0	0	0	0	0	0	0	0	0	0	0	0	0	0	0	0	0	0	0	0	0	0	0	0	0	0	0	0	0	0	0
Oti-egl-20
0	0	0	0	0	0	1	0	0	0	0	3	0	0	0	0	1	0	0	0	0	0	0	0	0	0	0	0	0	1	0	0	1	1	0	1	0	0	0	0	0	0	0	0	0	0	0	0	0	0
0	0	0	0	0	0	0	0	0	0	0	0	0	0	0	0	0	0	0	0	0	0	0	0	0	0	0	0	0	0	0	0	0	0	0	0	0	0	0	0	0	0	0	0	0	0	0	0	0	0
1	0	0	0	0	1	0	1	0	1	0	1	0	1	0	0	3	0	1	0	2	0	2	0	2	0	2	0	1	1	0	0	0	0	0	1	0	0	0	2	0	0	0	2	0	0	0	0	0	0
0	0	0	0	1	0	0	0	0	0	0	0	0	0	1	0	0	1	0	1	0	0	0	0	0	0	0	0	0	0	0	0	0	0	0	0	0	0	0	0	0	0	0	0	0	0	0	0	0	0
1	0	2	0	5	0	4	4	1	0	3	2	8	3	1	3	8	3	1	0	5	1	8	1	1	4	2	2	1	2	2	2	1	0	1	3	0	0	0	0	2	0	1	4	0	0	0	2	2	3
0	0	0	0	1	1	0	1	1	1	1	1	1	1	1	2	0	3	2	2	1	1	2	3	1	5	1	7	1	2	3	1	3	0	1	1	2	1	0	1	3	0	2	3	0	3	0	0	0	1
0	0	0	0	0	0	0	0	0	0	0	0	0	1	0	0	0	0	0	0	0	0	0	1	0	0	0	0	0	0	0	0	0	0	0	0	0	1	0	1	1	0	0	3	0	0	1	0	0	0
2	2	9	5	2	3	5	2	3	6	4	6	3	5	4	3	7	1	5	4	0	3	3	5	0	3	6	4	3	3	1	1	2	0	2	2	0	0	1	2	0	0	0	1	0	0	0	0	0	0
0	0	0	0	0	0	1	0	0	0	0	0	0	0	0	0	0	0	0	0	0	0	0	0	0	0	0	0	1	0	0	0	0	0	0	0	0	0	0	0	0	0	0	0	1	0	0	0	0	1
0	0	0	0	0	0	0	0	0	0	0	0	0	0	0	0	0	0	0	0	0	0	0	0	0	0	0	0	0	0	0	0	0	0	0	0	0	0	0	0	0	0	0	0	0	0	0	0	0	0
0	0	0	0	0	0	0	0	0	0	0	0	0	0	0	0	0	0	0	0	0	0	0	0	0	0	0	0	0	0	0	0	0	0	0	0	0	0	0	0	0	0	0	0	0	0	0	0	0	0
1	1	1	1	3	4	0	3	1	2	2	3	4	1	3	1	6	4	2	0	3	3	2	1	7	5	6	5	4	2	3	4	0	1	0	3	2	1	1	0	0	0	0	1	0	0	0	0	0	0
0	0	0	0	0	0	0	0	0	0	0	0	0	0	0	0	0	0	0	0	0	1	0	1	0	0	0	0	0	1	0	1	1	0	2	0	1	2	0	2	1	1	1	1	1	1	0	1	1	0
1	0	2	1	2	0	0	2	2	0	0	0	2	1	0	2	4	1	2	0	1	1	1	2	6	3	3	3	2	3	2	5	5	3	3	11	4	7	6	4	10	5	2	2	3	4	6	5	6	8
0	0	0	0	0	0	0	0	0	0	0	0	0	0	0	0	0	0	0	0	0	2	0	1	0	0	0	1	0	0	0	0	0	1	0	0	0	0	1	0	0	0	0	0	0	0	0	1	0	0
0	0	0	0	0	0	0	0	0	0	0	0	0	0	0	0	0	0	0	0	0	0	0	0	0	0	0	0	0	0	0	0	0	0	0	0	0	0	0	0	0	0	0	0	0	0	0	1	0	0
0	0	0	0	0	0	0	0	0	0	0	0	0	0	0	0	0	0	0	0	0	0	0	0	0	0	0	0	0	0	0	0	0	0	0	0	0	0	0	0	0	0	0	0	0	0	0	0	0	0
0	0	0	0	0	0	0	0	1	0	1	0	0	0	0	1	0	0	1	2	1	0	0	0	1	0	1	1	0	0	2	2	0	1	1	0	2	1	0	1	1	4	0	0	1	0	0	1	0	1
1	0	1	0	3	1	2	1	3	1	1	3	1	1	4	1	2	3	0	1	0	4	1	1	0	0	2	1	1	4	0	1	0	1	0	2	0	0	0	0	0	0	0	0	0	0	0	0	0	0
0	1	0	0	0	0	0	0	0	0	0	0	0	0	0	0	0	0	0	0	0	0	0	0	0	0	0	0	0	0	0	1	0	0	0	0	0	0	0	0	0	0	0	0	0	0	0	0	0	0
0	0	0	0	0	0	0	0	0	0	0	0	0	0	0	0	0	0	0	0	0	0	0	0	0	0	0	0	0	0	0	0	0	0	0	0	0	0	0	0	0	0	0	0	0	0	0	0	0	0
0	0	0	0	0	0	0	0	0	0	0	0	0	0	0	0	1	0	0	0	1	0	0	0	0	0	0	0	2	0	2	1	1	0	0	0	0	0	0	0	1	1	0	0	0	0	0	0	1	0
Oti-cwn-1
0	0	0	1	0	1	1	1	3	3	0	6	3	2	4	2	3	3	2	2	4	1	5	0	2	10	7	5	7	2	5	10	4	3	4	6	9	5	5	10	6	5	4	4	6	5	7	7	8	6
2	1	5	3	12	2	2	2	4	14	5	0	4	1	4	8	1	4	5	5	4	6	4	5	3	3	1	3	15	4	6	4	13	9	8	5	7	13	6	6	6	5	7	5	4	8	10	6	6	4
6	2	4	2	1	8	3	2	1	2	0	3	6	4	4	4	3	6	7	6	2	3	3	3	1	5	5	5	6	7	4	4	6	10	2	13	11	4	7	10	9	14	8	5	7	4	4	4	13	2
0	0	0	0	0	0	0	2	0	1	0	0	0	0	0	0	0	2	0	2	2	0	0	0	1	0	0	0	0	3	1	1	4	1	1	3	1	2	1	2	1	3	2	4	4	5	6	9	2	6
0	0	1	2	1	1	4	2	0	2	0	0	2	2	3	5	1	3	2	1	8	1	4	4	8	6	7	3	7	4	7	4	8	7	3	11	6	10	5	9	4	10	7	6	12	6	9	8	4	9
20	7	8	12	6	5	7	6	8	11	11	14	7	7	7	10	9	7	9	5	11	14	13	12	22	9	14	13	0	11	14	0	19	16	0	19	21	0	16	18	24	0	20	23	0	23	27	0	20	21
5	0	3	1	3	7	6	5	11	6	2	6	8	9	3	10	1	3	3	6	8	8	5	8	7	9	9	8	4	9	12	11	15	11	9	9	13	6	10	11	6	10	13	12	12	10	15	5	9	9
7	2	1	1	3	8	2	3	3	3	5	1	9	3	7	11	14	2	8	5	3	3	5	6	7	10	7	12	3	6	8	5	6	4	2	12	9	8	11	6	8	13	12	2	6	7	6	8	10	9
0	0	1	1	0	0	2	1	0	0	0	2	3	3	4	4	1	2	3	3	1	4	3	5	5	4	5	7	5	2	2	1	4	6	6	3	4	9	5	8	8	7	11	8	6	3	5	5	4	13
13	4	5	4	3	2	3	2	5	6	9	10	9	2	4	4	8	2	3	3	2	5	6	4	8	7	9	5	5	7	3	3	3	5	7	4	2	3	6	4	6	8	13	10	3	6	8	4	6	4
0	0	0	0	0	0	0	0	0	0	1	0	0	0	2	3	2	1	0	1	0	0	1	0	0	1	2	1	1	1	1	4	3	1	2	6	3	3	4	6	5	2	3	2	5	5	4	6	7	4
0	2	0	0	0	0	2	1	1	1	2	0	0	0	2	1	2	0	2	3	2	2	1	3	0	0	0	0	2	0	4	4	2	2	5	5	5	5	8	12	6	4	6	5	11	4	7	3	6	4
0	4	1	1	2	2	3	0	3	0	2	3	5	3	6	5	3	2	2	6	1	3	2	3	7	5	2	3	3	3	7	6	6	9	14	3	6	7	4	12	6	2	4	4	6	3	14	9	5	9
2	2	1	2	1	0	0	0	1	2	2	7	4	3	3	1	0	4	0	1	2	1	0	1	1	2	2	3	0	2	1	2	3	6	3	5	1	4	4	2	4	6	2	1	2	1	6	4	5	9
0	3	1	3	1	1	1	1	1	2	3	2	0	1	3	2	1	4	1	2	3	2	2	5	6	4	5	9	4	5	1	7	3	4	6	7	4	9	7	4	7	4	2	6	6	4	3	6	5	2
0	1	1	3	1	4	1	3	2	0	2	5	5	7	5	7	4	6	3	2	1	2	3	4	2	9	7	9	11	3	6	4	5	5	3	9	8	8	9	8	12	13	6	11	10	5	14	8	7	7
6	0	1	1	4	6	1	2	6	2	3	6	8	14	3	3	6	8	6	9	2	7	3	8	8	14	6	11	9	11	16	10	10	9	11	11	14	5	9	7	11	11	15	9	14	12	13	12	8	16
2	1	2	2	2	1	0	0	0	3	1	2	6	4	3	1	4	2	1	3	3	1	5	3	1	2	7	7	4	3	6	6	5	3	7	12	9	8	10	7	15	6	11	14	11	7	17	8	12	8
3	7	2	3	2	1	3	4	1	2	4	5	5	2	6	3	4	6	8	7	4	8	7	3	6	5	10	6	6	8	8	6	9	7	9	8	9	6	10	10	8	9	9	7	11	8	15	6	8	12
6	3	7	3	2	7	4	1	2	4	5	8	2	3	7	3	7	6	5	5	7	4	4	4	3	3	5	14	5	11	6	10	4	4	5	8	9	9	5	7	8	4	8	9	8	7	2	6	8	14
1	0	3	4	3	2	5	5	2	2	2	6	4	2	6	3	4	4	2	6	2	3	4	1	5	4	8	2	9	9	7	5	5	3	9	4	10	7	7	10	5	7	8	7	7	16	6	10	8	9
Oti-cwn-2
3	0	1	1	0	1	1	1	1	1	2	5	1	1	1	2	1	5	1	0	0	0	1	2	1	4	2	2	0	4	1	1	1	3	0	1	0	1	0	1	0	1	1	1	1	2	3	0	0	0
2	3	3	5	3	1	2	1	2	3	2	0	3	2	0	1	0	1	3	1	2	1	2	2	1	0	0	1	0	0	1	1	1	0	1	1	1	0	0	0	0	1	0	0	0	1	0	0	0	0
2	0	0	4	2	1	3	5	1	0	5	3	3	2	1	1	3	2	3	2	1	3	2	2	2	3	4	0	3	4	2	1	0	3	3	5	2	3	5	1	1	3	2	1	3	3	2	2	3	3
2	1	1	0	0	1	4	0	0	0	1	2	3	4	2	0	0	2	2	0	2	0	1	0	3	1	1	1	1	0	1	1	2	0	1	2	0	0	3	0	1	1	0	2	2	2	2	2	0	2
0	0	0	0	0	0	1	0	0	0	0	0	0	0	0	0	0	1	0	1	1	0	0	0	0	0	1	0	2	1	0	2	0	0	0	1	1	1	0	0	0	0	0	2	1	0	1	0	0	1
0	3	2	0	3	1	2	2	1	1	1	2	0	2	0	0	3	0	1	2	3	1	1	3	2	1	4	1	4	2	1	0	2	3	4	1	4	3	4	0	2	2	1	0	0	0	1	0	2	2
3	1	0	2	0	1	1	1	2	2	2	0	1	0	1	2	1	0	0	1	1	4	2	4	3	0	3	3	1	2	6	2	6	2	4	0	1	6	1	2	1	4	4	1	1	4	3	1	3	2
4	1	2	2	0	3	2	1	1	3	0	1	4	1	2	1	3	1	3	4	0	0	1	2	2	3	1	8	3	5	6	6	0	3	5	4	2	3	3	7	2	3	2	3	5	4	4	2	5	1
3	1	2	2	5	3	4	3	2	1	1	5	6	3	3	6	0	4	3	7	2	3	5	6	7	5	4	2	2	5	3	4	1	2	5	3	4	4	3	2	4	3	3	4	10	5	3	6	4	4
10	6	6	8	6	3	9	4	4	3	4	11	8	4	5	5	4	3	5	4	3	2	4	5	5	1	1	3	3	0	1	0	2	2	3	1	4	0	1	1	4	7	3	3	1	1	0	0	3	0
3	0	3	0	4	3	1	2	1	0	1	0	2	0	1	0	0	0	1	0	0	0	0	0	0	1	0	0	1	1	0	0	0	0	0	0	0	0	0	0	1	0	0	0	0	0	0	0	0	0
0	0	1	0	3	1	6	2	2	0	4	6	0	7	3	5	6	5	5	6	2	5	9	5	2	4	7	6	5	3	7	9	8	7	9	8	6	6	3	8	10	11	9	6	4	11	15	12	8	15
1	0	0	1	1	1	3	1	1	1	0	0	2	0	3	4	1	0	2	0	1	2	2	1	0	1	1	1	3	1	3	1	1	2	0	0	1	5	3	1	1	0	1	0	4	4	0	1	1	1
11	3	0	3	1	0	1	1	1	2	1	1	0	0	2	3	0	4	2	1	2	1	0	2	1	2	1	1	2	4	1	2	0	5	1	2	0	1	0	0	0	0	1	1	1	2	1	1	1	0
1	0	1	0	1	0	2	0	2	0	2	0	0	0	4	1	1	1	1	1	3	1	1	1	1	0	0	2	0	0	0	0	1	0	0	0	0	0	0	2	1	0	0	0	1	0	0	0	0	2
1	3	1	1	0	0	0	1	1	1	3	3	0	2	2	2	1	3	1	2	1	0	0	1	2	0	0	0	0	0	0	3	1	0	0	1	0	0	0	0	0	1	0	0	0	1	1	0	0	0
10	3	1	2	3	4	2	4	1	1	1	2	2	0	6	7	4	2	1	1	1	0	1	0	0	2	0	4	1	2	0	1	1	2	1	1	0	1	0	1	0	0	1	1	0	0	0	2	1	0
1	0	0	0	0	0	0	0	0	0	0	0	0	0	3	0	0	0	0	0	0	0	0	1	3	0	1	2	0	0	1	0	0	1	0	1	2	1	0	1	1	2	2	0	1	1	3	2	2	2
2	0	2	3	2	1	0	2	2	1	5	0	0	0	2	0	0	0	0	2	2	0	0	0	0	0	0	0	1	0	1	0	0	0	0	0	1	0	0	0	0	0	0	0	0	0	0	0	0	0
0	1	0	0	0	1	0	1	0	0	0	0	0	2	0	1	0	0	0	0	1	0	0	0	0	1	0	0	1	1	0	1	1	0	0	0	4	1	1	0	2	2	1	0	2	2	0	2	2	1
0	2	0	2	2	0	4	3	1	0	1	0	0	0	0	0	0	0	0	0	0	1	0	0	0	0	0	0	0	0	0	0	0	0	0	0	0	0	0	0	0	0	0	0	0	1	0	0	0	0
0	0	1	0	0	0	0	0	0	0	0	0	0	0	0	0	0	0	0	0	0	0	0	0	0	0	0	0	0	0	0	0	0	0	0	0	0	0	0	0	0	0	0	0	0	0	0	0	0	0
0	0	0	1	0	1	2	0	1	0	0	0	0	0	0	1	0	0	0	0	0	0	0	0	1	1	0	0	0	0	0	0	0	0	0	0	0	0	0	0	0	0	0	0	0	0	0	0	0	0
6	1	1	0	2	0	3	2	1	1	0	2	2	0	2	0	1	0	1	0	1	0	0	0	0	2	0	1	0	2	0	1	1	0	0	0	1	1	0	0	0	0	1	0	2	0	0	0	0	0
0	0	4	1	3	2	1	2	3	1	0	1	1	0	3	1	3	1	1	0	0	4	1	1	1	0	2	0	1	1	2	1	0	1	3	1	1	2	3	0	2	2	1	4	1	1	0	5	1	0
2	1	2	0	1	2	0	1	2	1	2	2	3	2	1	2	1	1	2	0	0	2	3	2	1	2	3	2	1	0	0	0	3	4	6	0	2	1	3	2	1	0	3	2	1	1	1	4	0	1
0	0	2	0	0	2	0	1	1	0	1	0	1	3	3	3	0	1	0	1	1	1	0	0	4	1	0	1	1	2	0	1	1	2	0	1	2	1	4	3	1	0	2	0	0	1	1	0	1	1
[truncated: 51 more columns]

## Sheet: Distances between cell nuclei
Species	Strain	Stage	Comment	Straight	P3P-AC	P4P-ACP	P5P-AC	P6P-AC	P7P-AC	P8P-AC	P3P-P4P	P4P-P5P	P5P-P6P	P6P-P7P	P7P-P8P
C. elegans	N2	Early L3	After molt	NA	63.308	47.9562	26.5026	5.42139	40.7796	69.4034	14.8621	23.884	31.884	36.1727	29.7049		Sizes are in microns
C. elegans	N2	Early L3	DU no div	NA	63.6405	54.8956	23.942	4.46263	38.2848	49.5361	17.8325	28.4278	29.8737	36.6095	24.5232
C. elegans	N2	Early L3	DU in div	NA	64.3389	53.308	26.7809	4.83376	29.3351	54.4021	12.4253	26.5966	23.8015	31.5052	25.4162
C. elegans	N2	Early L3	DU in div	NA	64.6843	53.1392	26.8351	4.38144	30.1302	55.893	13.192	27.0593	23.5915	32.3325	25.6302
C. elegans	N2	Early L3	After molt	NA	64.9678	52.8531	26.5219	5.20876	25.0103	62.4304	15.5322	28.1972	26.4214	33.6108	22.2075
C. elegans	N2	Early L3	DU no div	NA	69.5103	56.3106	29.9575	9.09278	46.2139	57.8763	24.8338	29.3673	30.5438	41.2539	24.5528
C. elegans	N2	Early L3	DU no div	NA	70.6869	55.0425	25.7307	4.37758	31.6598	56.8763	15.2397	29.5825	35.1753	40.1843	20.7345
C. elegans	N2	Early L3	After molt	NA	71.0619	54.5335	32.8982	3.2732	32.2023	55.4407	17.6263	21.9175	31.5271	34.0722	22.9781
C. elegans	N2	Early L3	DU no div	NA	72.058	59.6534	30.0812	3.23711	31.7487	60.8247	12.643	29.5451	28.1276	33.6031	29.3918
C. elegans	N2	Early L3	DU in div	NA	74.1405	56.8441	29.232	4.53222	32.2126	51.0503	24.076	26.5374	26.7526	34.5206	17.4317
C. elegans	N2	Early L3	DU in div	NA	74.6005	51.7925	26.7487	3.29381	40.1985	54.7668	26.8351	31.357	21.7655	39.7977	28.7487
C. elegans	N2	Early L3	DU no div	NA	76.5245	64.2835	36.0039	6.44974	30.8866	60.0503	20.0992	25.1057	30.8299	38.3647	26.7655
C. elegans	N2	Early L3	After molt	NA	76.8479	60.9304	36.1585	9.11598	31.5644	50.2719	15.6224	25.0567	27.1173	40.5077	18.6959
C. elegans	N2	Early L3	DU in div	NA	77.7784	54.3866	26.7152	4.49098	32.5335	56.6856	24.1211	28.4072	28.9304	30.8325	24.6675
C. elegans	N2	Early L3	DU no div	NA	80.3763	62.8402	31.3196	3.26289	40.4149	58.5567	19.1121	36.4549	30.2436	41.9858	19.317
C. elegans	N2	Early L3	DU no div	NA	81.116	62.0142	32.1843	3.72165	33.5567	46.1817	19.4304	28.6095	22.7874	34.1997	27.3222
C. elegans	N2	Early L3	DU no div	NA	84.5013	60.9755	31.0722	8.59536	33.6121	58.8299	23.9291	30.0979	23.8595	40.9858	25.5064
C. elegans	N2	Early L3	DU no div	NA	85.6611	61.4536	35.875	5.91624	39.558	59.2075	25.9497	26.6327	34.5361	38.7552	24.4433
C. elegans	N2	Early L3	DU no div	NA	86.3144	58.0425	26.8724	5.07603	33.2938	64.8054	18.3196	26.0258	28.7912	34.2461	24.7345
C. elegans	N2	Early L3	DU no div	NA	86.3956	58.0116	29.067	6.48711	38.3415	68.2526	27.8595	27.2075	28.1456	38.9678	23.018
C. elegans	N2	Early L3	After molt	NA	87.1559	52.4072	35.2307	5.89562	28.8557	51.5876	15.8647	23.5773	24.3286	34.3428	28
C. elegans	N2	Early L3	DU no div	NA	90.2693	59.9098	34.9729	5.86211	29.5992	67.308	18.0206	22.799	26.4536	35.8389	29.0631
C. elegans	N2	Early L3	DU in div	NA	97.8802	61.576	29.1469	5.16881	26.8209	50.9317	17.1198	30.9832	24.6714	37.3853	21.5515
C. elegans	N2	Early L3	DU no div	NA	100.081	58.2075	35.5838	3.58763	34.8531	67.4691	21.9278	27.0374	32.8273	26.2036	26.5013
C. elegans	N2	Early L3	DU no div	NA	113.155	58.9278	29.9781	4.45619	34.6843	60.1379	62.2719	32.5103	29.4381	36.4588	24.7281
C. elegans	N2	L2 molt		NA	56.9059	63.0863	27.8647	9.3299	21.1495	39.75	22.8247	24.3067	17.2448	29.5322	15.5399
C. elegans	N2	L2 molt		NA	57.5	53.4626	31.6443	14.2101	17.326	39.8544	21.5116	25.7191	17.0657	29.8466	30.1649
C. elegans	N2	L2 molt		NA	59.3608	60.0258	29.1134	12.0593	21.2603	38.4034	17.5477	13.1585	15.8582	28.884	23.9665
C. elegans	N2	L2 molt		NA	62.0464	60.241	39.9794	11.192	17.8634	27.5876	20.7938	28.4639	16.5992	35.6997	14.0464
C. elegans	N2	L2 molt		NA	63.2229	42.8119	25.9936	12.2809	27.8531	43.607	20.3402	20.8003	14.3595	30.2629	28.317
C. elegans	N2	L2 molt		NA	64.9278	58.6443	28.9149	7.74742	32.0064	47.7719	22.5593	22.3647	18.9356	28.5013	25.0284
C. elegans	N2	L2 molt		NA	66.9008	55.2616	29.4175	9.76933	23.0412	49.4729	19.7951	32.5013	14.8093	28.2255	20.9678
C. elegans	N2	L2 molt		NA	67.7745	35.6753	28.866	12.1302	18.6817	35.7771	19.0631	23.7474	16.1598	30.7294	21.9523
C. elegans	N2	L2 molt		NA	69.5116	52.7487	29.3273	11.5464	21.8041	43.9485	17.0193	23.5052	18.4807	31.5064	21.9072
C. elegans	N2	L2 molt		NA	72.5206	68.0889	25.0284	11.4433	24.7784	29.3415	15.7397	26.4446	17.5155	31.6173	19.7642
C. elegans	N2	L2 molt		NA	73.6108	59.4149	39.0863	13.259	19.5554	50.1147	12.5335	19.116	17.3647	30.768	19.2616
C. elegans	N2	L2 molt		NA	73.7216	45.0966	30.4098	8.67912	14.4497	49.2642	22.4755	20.4974	16.8041	32.7874	23.7216
C. elegans	N2	L2 molt		NA	73.9536	55.4343	23.9265	7.43814	21.3814	31.4124	21.1843	27.4858	20.866	30.8312	17.5722
C. elegans	N2	L2 molt		NA	78.2036	52.0219	25.8918	11.4394	21.5039	45.7358	18.7165	31.7745	17.1765	29.6985	9.16624
C. elegans	N2	L2 molt		NA	78.3209	55.2461	30.9948	9.57474	20.9459	36.8247	23.0399	24.857	23.8376	24.3144	25.0271
C. elegans	N2	L2 molt		NA	79.0515	54.1559	31.0399	12.7242	20.5619	40.0954	15.7101	21.1946	16.4562	35.7912	21.2835
C. elegans	N2	L2 molt		NA	90.2126	49.0541	27.2487	16.6804	13.9497	46.4407	16.1946	19.2668	18.9008	36.3982	22.9987
C. elegans	N2	Late L3	SS no div	NA	63.375	45.0155	29.317	3.69974	36.8853	64.1856	21.3866	16.6959	30.0039	36.3595	28.857
C. elegans	N2	Late L3	SS div	NA	64.0219	55.1314	27.2436	3.42526	31.2358	63.0026	21.942	30.875	28.0747	38.1314	25.4188
C. elegans	N2	Late L3	SS in div	NA	64.9265	48.942	27.7642	6.54124	31.5876	58.0644	17.1778	21.3247	21.5245	37.6482	26.4665
C. elegans	N2	Late L3	SS no div	NA	65.9948	50.4369	27.4923	3.49356	30.5284	63.3015	17.2899	23.6302	27.5193	29.4214	32.308
C. elegans	N2	Late L3	SS in div	NA	67.8273	53.9381	25.7229	3.78866	28.518	48.2191	14.1688	28.625	23.3273	30.0258	19.9768
C. elegans	N2	Late L3	SS no div	NA	68.509	48.0374	27.9974	4.3067	30.4278	58.3067	20.5593	20.0361	25.9265	30.7577	27.9549
C. elegans	N2	Late L3	SS no div	NA	68.7384	63.8402	26.6791	5.22294	30.7564	57.6804	21.1495	24.3273	26.9394	31.951	27.3222
C. elegans	N2	Late L3	SS in div	NA	69.518	56.0155	31.1753	8.40979	25.4356	55.7281	15.7835	25.4639	23.7023	32.9059	35.6701
C. elegans	N2	Late L3	SS no div	NA	70.4961	60.5941	31.6894	4.49485	29.6482	49.1521	18.049	34.9768	30.6314	23.8041	28.6972
C. elegans	N2	Late L3	SS in div	NA	71.7758	49.1405	30.4575	2.83892	32.3312	60.3235	23.5979	28.0245	31.7732	37.7268	17.6392
C. elegans	N2	Late L3	SS in div	NA	72.2448	35.9008	27.3054	6.96005	37.9807	65.8505	21.4807	25.9227	20.3041	35.6765	31.6095
C. elegans	N2	Late L3	SS no div	NA	73.8054	65.0438	34.7088	7.27577	30.4291	65.4201	18.9085	29.2887	31.7526	36.9858	29.1095
C. elegans	N2	Late L3	SS no div	NA	74.8956	52.7281	28.8879	6.48969	34.0399	61.9562	19.75	22.5335	31.7655	34.5567	35.3041
C. elegans	N2	Late L3	SS in div	NA	75.1997	55.174	29.3015	5.71392	29.9781	49.7165	20.8428	26.4072	24.5399	33.3866	20.3119
C. elegans	N2	Late L3	SS no div	NA	76.2332	63.0644	29.9626	3.17526	30.9085	65.4691	17.1057	29.1418	30.9858	42.6765	25.5825
C. elegans	N2	Late L3	SS no div	NA	78.4665	56.5528	29.6314	3.41237	30.7938	60.0387	20.5825	20.7423	31.183	37.0271	19.7423
C. elegans	N2	Late L3	SS div	NA	81.5567	59.7706	32.8015	5.84536	35.8209	70.0902	22.1405	28.3608	31.6624	38.2448	32.6057
C. elegans	N2	Late L3	SS div	NA	84.1134	58.8003	32.5554	6.88144	39.4021	46.1894	19.9678	23.0284	34.4021	41.3144	22.8119
C. elegans	N2	Late L3	SS div	NA	85.4369	60.0644	34.8879	4.40593	40.1057	61.6108	24.4678	25.2448	35.2603	39.6791	21.9343
C. elegans	N2	Late L3	SS in div	NA	86.6018	65.3776	30.9265	4.375	34.6804	65.1753	21.3428	34.7719	33.1276	32.5528	30.7474
C. elegans	N2	Late L3	SS div - really late	NA	90.634	61.2165	34.3015	7.64948	28.4356	53.6946	30.4626	26.5052	31.6508	27.634	26.0825
C. elegans	N2	Late L3	SS div	NA	91.7436	59.5477	35.241	6.9884	29.7294	66.2204	20	26.9678	33.0606	34.9162	21.491
C. elegans	N2	Late L3	SS div	NA	92.5013	70.5271	37.8505	4.32216	40.6714	67.8827	21.6302	32.8054	38.634	40.1405	27.9626
C. elegans	N2	Late L3	SS in div	NA	93.817	52.259	28.7397	5.76289	30.3892	59.5541	19.0954	14.4523	23.058	31.1276	22.7088
C. elegans	N2	Late L3	SS div - really late	NA	94.7139	52.1881	27.3673	6.49356	39.3866	61.058	19.9253	23.9162	27.9536	32.5941	24.7603
C. elegans	N2	Late L3	SS div - really late	NA	96.0941	70.2603	36.1237	5.17784	41.1495	68.8028	26.9265	34.9137	38.2809	41.2049	28.9974
C. elegans	NW1615	Early L3	DU in div	No	61.7577	48.9755	23.6005	2.78995	29.8028	56.9433	14.3003	26.5863	24.8389	27.7255	27.5915
C. elegans	NW1615	Early L3	DU in div	Yes	74.8737	68.2358	39.2539	7.0683	36.9845	64.5954	27.683	27.9111	21.7861	26.4781	36.6379
C. elegans	NW1615	Early L3	DU in div	No	77.2216	73.5593	33.8621	14.3814	14.3363	51.4549	31.5052	32.2925	24.424	28.232	32.6804
C. elegans	NW1615	Early L3	DU no div	Yes	78.0206	63.75	32.1585	7.09407	28.7165	52.192	14.5219	31.7513	25.4497	35.2088	23.2655
C. elegans	NW1615	Early L3	DU no div	No	82.7642	76.5876	31.9562	9.75515	28.6894	56.3505	14.3608	29.2912	23.0928	29.4755	27.9175
C. elegans	NW1615	Early L3	DU in div	No	85.0193	72.1495	36.3814	8.9433	33.9678	54.6121	33.2384	31.6314	26.0284	33.1933	23.7835
C. elegans	NW1615	Early L3	DU in div	No	85.5657	77.518	35.7526	7.02448	31.9072	49.2925	22.9394	34.8544	22.6057	38.1817	26.7706
C. elegans	NW1615	Early L3	DU no div	No	86.7758	61.3312	33.0786	9.0232	36.8647	63.9575	25.6688	28.1443	24.5193	45.9704	27.5116
C. elegans	NW1615	Early L3	DU in div	Yes	87.1186	69.2809	28.3918	9.71907	29.384	53.7487	22.2938	32.3363	24.6765	33.366	28.7023
C. elegans	NW1615	Early L3	DU in div	Yes	87.9472	55.3273	28.9008	5.15851	28.3106	53.7526	32.9343	26.1959	24.6082	32.3325	25.6933
C. elegans	NW1615	Early L3	DU in div	No	88.8814	72.107	36.8157	10.0541	34.6611	66.9253	18.7577	35.4897	26.893	45	32.9356
C. elegans	NW1615	Early L3	DU no div	No	89.3711	59.3802	24.9794	9.63402	30.2088	48.884	19.9085	28.607	29.7822	27.5851	17.1611
C. elegans	NW1615	Early L3	DU no div	Yes	90.9562	67.2758	34.8183	11.0116	29.5129	56.018	20.0399	31.2191	21.5851	28.3724	29.5013
C. elegans	NW1615	Early L3	DU in div	Yes	91.3737	64.5825	26.991	7.1018	30.991	51.4485	29.799	30.1405	20.6817	29.5374	28.2113
C. elegans	NW1615	Early L3	DU in div	No	93.0992	69.9008	37.3789	13.7345	29.5168	56.1534	24.991	33.6366	23.884	43.3415	26.393
C. elegans	NW1615	Late L3	SS in div	Yes	72.2345	49.317	30.857	8.03866	35.0387	54.0309	22.9034	18.5168	23.3028	42.3892	18.8982
C. elegans	NW1615	Late L3	SS no div	Yes	76.4588	57.433	33.0722	5.98711	34.6985	44.4008	23.8389	26.643	24.4278	30.1418	21.7899
C. elegans	NW1615	Late L3	SS in div	No	78.1546	57.0966	24.2242	8.92655	32.4987	50.8531	26.5928	25.9536	32.2642	26.7036	27.9124
C. elegans	NW1615	Late L3	SS in div	No	78.2668	51.6147	31.5992	9.51418	28.393	40.567	27.3003	23.6353	24.451	45.0503	26.0374
C. elegans	NW1615	Late L3	SS in div	No	78.8892	51.5116	30.9678	2.87242	29.9704	58.1611	23.4162	25.634	36.3789	24.5219	26.2397
C. elegans	NW1615	Late L3	SS in div	No	80.1856	66.6327	34.3119	10.357	26.5425	55.2397	25.2255	29.1147	31.0296	23.1327	28.1907
C. elegans	NW1615	Late L3	SS in div	No	81.7655	62.1598	34.3041	5.6366	33.3853	51.067	28.4845	20.2075	31.4369	23.6611	25.6649
C. elegans	NW1615	Late L3	SS div - late	No	82.8634	55.0348	37.3286	6.30928	30.8363	60.2126	29.3106	19.6933	33.1869	39.6598	27.3247
C. elegans	NW1615	Late L3	SS in div	Yes	83.1276	59.6585	32.6765	7.91237	23.8067	65.0876	33.0902	21.5889	26.982	34.5876	28.5438
C. elegans	NW1615	Late L3	SS in div	No	86.5206	48.9034	36.0619	6.89562	32.1546	50.6418	25.0103	25.9768	29.0503	34.8802	27.1327
C. elegans	NW1615	Late L3	SS div - late	No	87.3698	60.6211	33.0052	4.41237	29.7255	67.6946	29.0799	25.1405	26.4485	42.9008	29.7899
C. elegans	NW1615	Late L3	SS no div	No	87.5219	62.6869	38.5812	3.10052	28.8686	61.4265	20.4356	23.5915	32.8698	30.5129	20.6701
C. elegans	NW1615	Late L3	SS no div	Yes	87.8286	61.0825	37.2771	5.43686	26.2706	57.2809	27.1392	23.4704	32.5941	31.5863	31.0606
C. elegans	NW1615	Late L3	SS in div	No	90.0683	62.4613	30.0541	9.18686	30.3119	51.2513	30.4137	26.7577	34.2539	25.25	30.8892
C. elegans	NW1615	Late L3	SS in div	No	90.2552	59.6018	34.4987	7.99227	31.1044	61.7461	23.4858	31.8028	31.3183	34.4742	30.0206
C. elegans	NW1615	Late L3	SS div - late	No	93.0064	64.049	29.9794	6.21521	27.0889	53.4201	30.6869	34.5258	33.1289	22.3376	26.1546
C. elegans	NW1615	Late L3	SS in div	No	93.6379	59.3196	34.9008	5.34278	32.7513	50.0567	27.732	27.2822	31.107	27.1753	24.7113
O. tipulae	CEW1	Early L3	DU in div	No	43.674	33.6881	20.6379	3.12242	21.5606	45.8428	10.3157	13.2216	17.8776	24.0464	24.2474
O. tipulae	CEW1	Early L3	DU in div	No	50.6624	36.7255	18.0477	2.98196	20.8763	43.0619	14.0735	18.8557	19.1289	19.7616	22.1856
O. tipulae	CEW1	Early L3	DU no div - just after molt	Yes	53.951	39.5052	20.3763	2.40593	18.3351	42.9008	14.5515	19.3209	20.1869	18.5799	24.7332
O. tipulae	CEW1	Early L3	DU in div	Yes	55.4343	42.1881	20.6314	3.34665	19.9317	42.3724	13.3351	21.8582	18.6134	22.1134	22.3312
O. tipulae	CEW1	Early L3	DU in div	No	55.8003	39.5735	18.7075	4.1933	22.0979	43.6907	16.3892	21.0863	19.1791	21.6765	21.3621
O. tipulae	CEW1	Early L3	DU in div	No	56.2809	44.0606	21.8814	3.55799	21.3466	38.5838	12.4768	22.2964	24.2526	19.3943	17.982
O. tipulae	CEW1	Early L3	DU in div	No	56.3441	40.8698	17.8814	3.5451	25.5773	41.5889	16.2294	23.1778	19.4562	25.0348	17.0554
O. tipulae	CEW1	Early L3	DU no div - just after molt	No	56.5399	40.7732	19.7062	3.64691	21.1649	46.6907	15.8196	20.9768	21.9897	18.817	25.634
O. tipulae	CEW1	Early L3	DU no div - just after molt	No	56.7706	42.2758	21.9704	3.87758	21.2436	37.3299	14.8827	20.3853	18.9291	23.3466	16.0851
O. tipulae	CEW1	Early L3	DU in div	No	57.3673	40.9936	20.4472	3.07474	19.9858	42.6959	17.0077	20.8647	20.0696	19.9871	23.0322
O. tipulae	CEW1	Early L3	DU in div	No	57.6933	43.9768	24.0296	3.74613	15.4948	31.1804	13.8621	19.7526	21.4291	17.5915	15.3441
O. tipulae	CEW1	Early L3	DU in div	No	59.442	42.6856	19.7113	4.09923	25.143	44.9588	16.7165	22.7539	22.3492	22.0979	20.0902
O. tipulae	CEW1	Early L3	DU no div - just after molt	No	59.6005	44.0013	18.5825	2.3982	13.1843	35.6688	16.8673	26.8634	17.9111	13.9678	23.0464
O. tipulae	CEW1	Early L3	DU no div - just after molt	No	59.6443	39.692	20.8802	2.52191	18.3956	37.0425	20.7874	18.6765	20.6624	18.9974	18.6121
O. tipulae	CEW1	Early L3	DU no div - just after molt	No	61.9253	46.9626	23.2242	3.57216	21.7668	36.6108	15.8041	23.8789	21.5747	23.1675	14.7126
O. tipulae	CEW1	Early L3	DU in div	No	62.567	35.9265	17.5825	4.96134	20.7178	34.9433	26.4987	18.6675	20.3299	17.0644	14.4729
O. tipulae	CEW1	Early L3	DU in div	Yes	69.1765	51.3454	26.4485	4.1701	19.6198	39.7809	17.9961	25.0593	23.2977	23.2474	19.857
O. tipulae	CEW1	Early L3	DU no div - just after molt	No	73.2165	49.3557	27.1392	4.22552	17.6418	37.3144	24.634	22.6804	24.3621	19.3724	20.9845
O. tipulae	CEW1	Early L3	DU in div	Yes	76.9961	44.2784	18.8273	3.96392	23.6624	45.2023	33.0593	25.5683	21.4768	20.9485	21.5374
O. tipulae	CEW1	L2 molt		No	49.1688	34.4265	15.8093	4.70876	24.5013	48.6972	14.7552	18.5103	19.6959	20.5103	24.8093
O. tipulae	CEW1	L2 molt		No	51.616	44.0116	20.491	3.90979	19.6276	34.3686	9.24356	23.6521	19.2423	20.3827	14.9665
O. tipulae	CEW1	L2 molt		No	52.3273	38.0889	20.4961	2.98582	21.567	37.4265	14.8028	17.759	20.1379	20.8698	15.9845
O. tipulae	CEW1	L2 molt		No	52.4626	37.509	18.8879	5.8183	29.0464	50.3299	15.4794	18.8338	24.1585	24.6714	21.6521
O. tipulae	CEW1	L2 molt		No	52.509	39.8312	17.7126	3.84149	20.0374	36.9974	12.8866	22.1224	19.0915	17.7101	16.9343
O. tipulae	CEW1	L2 molt		No	52.6095	38.2281	18.0309	3.21907	19.3634	40.2577	15.3338	20.5631	16.2835	20.2642	20.692
O. tipulae	CEW1	L2 molt		No	53.6959	38.8905	19.6224	3.875	20.3647	33.2771	15.0399	20.0477	18.1546	20.549	12.9858
O. tipulae	CEW1	L2 molt		No	53.8196	37.8673	17.9832	3.68299	22.4201	51.3003	16.2397	21.4575	19.4613	21.0245	28.3209
O. tipulae	CEW1	L2 molt		No	57.2577	35.2745	19.2784	3.26933	18.4794	42.7216	22.1572	15.9845	19.6946	16.9742	24.6418
O. tipulae	CEW1	L2 molt		No	57.3866	43.018	17.8209	6.1701	22.433	44.4497	15.3879	26.2526	22.8698	17.6637	22.5425
O. tipulae	CEW1	L2 molt		No	57.6482	40.4188	20.1585	3.15077	19.8041	56.5941	17.5722	19.9961	20.3119	19.826	36.5129
O. tipulae	CEW1	L2 molt		No	57.6521	40.0606	22.6263	3.20103	22.0116	42.5168	17.8402	17.5631	25.5142	19.451	20.433
O. tipulae	CEW1	L2 molt		No	57.8003	38.2539	17.0541	5.59536	23.6675	39.4369	19.8634	21.0851	21.6469	18.7436	16.0374
O. tipulae	CEW1	L2 molt		No	58.1418	37.0722	21.2358	5.1817	24.2925	55.3247	21.6972	15.6418	25.5026	19.9265	31.5889
O. tipulae	CEW1	L2 molt		No	58.4678	44.6173	23.0735	4.46521	15.7809	30.8686	14.1186	21.6856	19.5979	18.9742	15.1688
O. tipulae	CEW1	L2 molt		No	62.2229	47.0515	23.6778	2.96778	24.7822	51.1804	15.9755	23.3389	24.2461	24.2745	26.3209
O. tipulae	CEW1	Late L3	SS in div	No	43.451	30.366	17.616	3.51546	18.9704	33.0039	14.2758	13.1662	17.643	16.8982	14.4059
O. tipulae	CEW1	Late L3	SS div	No	48.174	38.2345	17.9523	4.31443	25.8724	40.1405	9.84407	20.6598	20.0399	22.4601	14.5438
O. tipulae	CEW1	Late L3	SS in div	No	49.8969	35.5284	20.8918	4.26418	15.7552	34.567	14.3969	14.8389	18.8454	17.0838	18.8814
O. tipulae	CEW1	Late L3	SS in div	No	50.1521	34.2784	22.3312	3.79639	21.7616	34	15.8724	12.1534	21.1688	22.0399	12.2642
O. tipulae	CEW1	Late L3	SS in div	No	51.8673	35.0644	16.5039	3.14433	18.567	29.3054	17.3827	18.4201	17.0799	16.8415	10.7191
O. tipulae	CEW1	Late L3	SS no div	No	52.1302	31.8505	14.3273	5.80412	20.6366	34.6418	20.7732	18.1649	17.7088	15.4562	14.3041
O. tipulae	CEW1	Late L3	SS div	No	58.3531	37.9601	21.482	2.47423	18.7629	33.0425	21.4227	16.9549	20.9111	18.1662	14.0425
O. tipulae	CEW1	Late L3	SS in div	No	58.7899	39.4175	21.9549	4.06572	15.3982	33.8119	19.9111	17.4446	19.5412	16.8119	18.8466
O. tipulae	CEW1	Late L3	SS in div	No	59.4536	42.7668	18.7912	3.45361	22.3144	45.558	16.8711	25.0696	20.5851	21.1379	23.2371
O. tipulae	CEW1	Late L3	SS in div	Yes	59.4652	41.3222	19.6366	4.32088	19.1598	36.0735	17.7693	21.1765	17.1997	21.5013	17.1765
O. tipulae	CEW1	Late L3	SS div	Yes	61.0928	41.6186	21.058	4.46778	20.2088	42.0709	19.6856	20.7191	19.8647	19.9858	22.0619
O. tipulae	CEW1	Late L3	SS in div	No	61.8827	40.7191	22.3466	4.58119	20.6624	40.2822	21.9394	18.6198	22.1289	19.5915	20.0309
O. tipulae	CEW1	Late L3	SS div	No	62.0683	27.2487	14.5348	4.54253	20.643	38.1224	35.2655	12.7809	16.9626	16.2784	17.6147
O. tipulae	CEW1	Late L3	SS div	Yes	62.1327	34.7564	17.3415	4.86082	17.5077	39.4137	27.7977	17.1765	17.3698	16.732	22.0979
O. tipulae	CEW1	Late L3	SS in div	No	62.2899	32.7397	16.268	3.78093	17.9845	36.8737	29.7848	16.5657	17.8054	15.201	19.1302
O. tipulae	CEW1	Late L3	SS no div	No	65.0232	49.2448	27.1753	2.85696	20.9871	40.3737	15.8441	22.1662	27.7822	20.6057	19.4936
O. tipulae	CEW1	Late L3	SS in div	Yes	65.0232	49.2358	23.3827	7.3183	13.3299	41.1624	16.0979	25.9085	16.3376	19.9884	27.5503
O. tipulae	CEW1	Late L3	SS div	Yes	66.857	44.6611	19.3196	4.19716	22.8415	43.8866	22.6443	25.4704	21.4356	20.6508	21.0245
O. tipulae	CEW1	Late L3	SS div	No	67.2887	44.4278	23.1366	4.04897	25.7513	43.5438	24.1031	22.4291	25.018	24.5219	18.2036
O. tipulae	CEW1	Late L3	SS div	No	69.9111	46.3711	23.4781	3.91495	20.4214	42.7964	23.7951	22.8789	21.5103	21.6714	22.2023
O. tipulae	CEW1	Late L3	SS div	No	70.433	40.6508	22.5335	3.48711	14.0528	38.2616	30.1585	17.8982	20.5902	15.192	24.5631
O. tipulae	CEW1	Late L3	SS in div	Yes	71.3544	41.2848	19.1276	4.74742	23.0554	45.4008	31.1778	22.8363	21.4278	20.6688	22.5722
O. tipulae	CEW1	Late L3	SS in div	No	79.5709	42.7126	20.058	3.84149	17.8067	33.4613	37.3028	23.076	19.3531	18.116	15.8982
O. tipulae	JU108	Early L3	DU no div - just after molt	No	52.3003	34.6108	17.5284	2.75129	19.2835	36.0387	18.2771	17.5258	16.8157	19.9124	17.509
O. tipulae	JU108	Early L3	DU in div	No	53.6869	26.8222	19.7732	5.28995	19.268	37.2668	27.6753	7.32474	17.4665	19.518	17.7693
O. tipulae	JU108	Early L3	DU in div	No	58.2113	38.8196	17.4085	4.65979	16.5966	23.6147	19.8273	21.3814	19.2126	12.6985	7.08376
O. tipulae	JU108	Early L3	DU in div	No	61.3531	40.8853	16.4162	3.66624	21.299	36.7371	27.3286	15.0747	21.8814	23.2216	8.84149
O. tipulae	JU108	Early L3	DU no div - just after molt	No	62.3814	34.5348	19.6263	4.61469	21.6082	36.4021	27.8479	15.2062	20.0631	19.692	14.8544
O. tipulae	JU108	Early L3	DU in div	No	63.0103	31.7332	14.875	4.34278	32.4356	46.2822	31.884	17.6031	17.3608	29.6791	14.3802
O. tipulae	JU108	Early L3	DU in div	No	63.4201	28.3196	21.5477	5.26031	23.2152	39.9188	24.3209	17.0966	21.6082	20.9162	15.4936
O. tipulae	JU108	Early L3	DU no div - just after molt	No	63.4704	38.5026	22	2.70232	14.1997	36.2951	26.8041	15.5722	20.7861	17.1856	11.1804
O. tipulae	JU108	Early L3	DU no div - just after molt	No	63.7126	44.4227	18.2719	4.23196	26.701	56.0245	16.7023	26.1856	21.259	23.4188	29.2204
O. tipulae	JU108	Early L3	DU in div	No	65.0928	33.5322	19.8479	3.75515	20.3144	33.4652	25.3428	19.0206	18.6637	18.6778	16.8621
O. tipulae	JU108	Early L3	DU in div	No	69.3338	33.0683	21.9175	2.66237	23.2423	42.8157	27.5412	13.8673	21.4523	19.7513	14.0735
O. tipulae	JU108	Early L3	DU in div	No	69.4446	32.1804	15.1495	4.71005	21.4137	37.5992	28.6405	20.0103	18.4356	18.4162	18.3273
O. tipulae	JU108	Early L3	DU in div	No	69.6392	39.1598	12.201	6.31057	16.7075	34.7474	30.018	18.9188	19.817	22.7345	12.8273
O. tipulae	JU108	Early L3	DU in div	No	70.2423	37.4704	21.9304	4.2049	20.8338	40.8222	28.3131	19.6675	19.7191	19.2062	17.6727
O. tipulae	JU108	Early L3	DU in div	No	70.5722	39.7938	22.8647	3.64948	19.1044	36.018	27.7487	15.2397	20.1894	20.6611	15.2242
O. tipulae	JU108	Early L3	DU in div	No	70.8479	37.8183	24.4961	4.24613	16.6405	32.1675	27.7294	16.1662	16.6327	22.2745	15.1353
O. tipulae	JU108	Early L3	DU in div	Yes	71.4214	45.0361	21.9124	3.65464	17.2023	27.3531	26.616	23.3428	19.7809	19.1662	9.97165
O. tipulae	JU108	Early L3	DU in div	No	71.7861	42.7332	22.1456	5.56701	7.78093	17.5013	29.4214	20.7423	16.6907	12.0206	10.1933
O. tipulae	JU108	Early L3	DU in div	No	73.0851	39.6662	21.8724	3.47423	18.2216	29.375	34.5335	17.9716	21.1933	18.8196	11.4124
O. tipulae	JU108	Early L3	DU in div	No	73.2771	31.9227	18.5052	5.68428	16.1637	23.2899	41.7912	13.2139	13.1005	21.1186	7.22423
O. tipulae	JU108	Early L3	DU in div	No	73.366	38.817	22.7165	3.35567	19.384	30.5232	30.0399	15.0876	19.4472	20.2139	18.2951
O. tipulae	JU108	Early L3	DU in div	No	74.4691	29.2771	19.4072	3.78351	24.3157	40.5979	49.5219	9.84665	20.4034	23.3144	17.4832
O. tipulae	JU108	Early L3	DU in div	No	75.3621	37.0155	12.6946	2.7384	16.9046	34.1508	29.893	18.4162	19.134	19.9381	12.1546
O. tipulae	JU108	Early L3	DU no div - just after molt	No	81.2036	58.2539	26.6585	5.80928	21.0851	46.9291	24.0528	32.0219	22.6701	24.6727	26.5348
O. tipulae	JU108	L2 molt		No	61.1353	44.4227	18.2719	4.23196	26.701	53.4472	14.125	8.93814	9.21649	10.9987	7.55541
O. tipulae	JU108	L2 molt		No	63.5387	38.3441	21.2925	5.63918	17.8892	27.4626	42.826	12.741	7.82474	8.3067	10.1765
O. tipulae	JU108	L2 molt		No	63.7461	39.0696	18.7758	4.08376	16.8312	28.3196	33.174	4.15206	9.88918	11.509	6.86856
O. tipulae	JU108	L2 molt		No	65.2178	39.7861	9.67655	4.83119	13.9111	23.4175	35.0399	7.7616	10.0709	13.8054	9.74871
O. tipulae	JU108	L2 molt		No	65.2977	38.9317	21.1869	3.47423	17.6508	21.8338	36.5077	8.16237	9.94974	10.8131	4.01933
O. tipulae	JU108	L2 molt		No	68.7874	43.7668	23.1018	2.96392	16.3351	24.8415	28.7552	6.90593	10.7629	9.71005	7.93041
O. tipulae	JU108	L2 molt		No	71.4214	45.0361	21.9124	3.65464	17.2023	27.3531	26.616	12.2861	10.8711	13.5155	4.91237
O. tipulae	JU108	L2 molt		No	73.0851	39.6662	21.8724	3.47423	18.2216	29.375	34.5335	6.59278	11.6095	10.7668	11.2371
O. tipulae	JU108	L2 molt		No	73.2771	31.9227	18.5052	5.68428	16.1637	23.2899	41.7912	8.83119	7.47423	14.4871	6.65851
O. tipulae	JU108	L2 molt		No	80.3582	41.0838	20.9884	4.76675	12.4188	25.8789	34.5477	9.61211	11.1263	12.7526	6.74871
O. tipulae	JU108	Late L3	SS in div	No	41.0348	39.259	21.6572	4.76031	20.1637	28.8776	43.5889	3.40335	3.54381	11.5902	-0.543814
O. tipulae	JU108	Late L3	SS in div	No	41.3905	36.3466	24.9201	5.37113	20.0515	30.6972	45.5979	3.02706	6.19716	8.51675	2.59923
O. tipulae	JU108	Late L3	SS no div	No	49.3389	26.3363	15.1933	5.55928	7.23067	30.7668	25.1843	8.47423	14.1082	14.4046	26.4858
O. tipulae	JU108	Late L3	SS no div	No	50.8673	26.201	15.6366	4.32088	8.54639	33.7835	24.9807	10.6031	12.3763	10.6985	25.4034
O. tipulae	JU108	Late L3	SS in div	No	63.5361	51.8982	17.2784	5.18428	33.6418	41.143	15.5747	30.3351	20.6186	29.0876	8.97036
O. tipulae	JU108	Late L3	SS in div	No	63.7784	40.0348	30.2152	3.63789	22.0966	33.9768	45.049	0.965206	7.70619	3.62758	5.48325
O. tipulae	JU108	Late L3	SS in div	No	66.4691	38.8067	19.1843	5.50258	10.6379	18.4253	27.3505	8.28093	10.0979	4.28093	6.14046
O. tipulae	JU108	Late L3	SS in div	No	67.1637	39.2977	27.5219	5.57088	20.7216	30.2384	47.0876	4.40722	10.424	5.89691	5.35954
O. tipulae	JU108	Late L3	SS in div	No	69.0528	36.1778	22.5876	5.09149	10.9369	21.6881	25.826	8.86985	13.6546	7.3183	9.79768
O. tipulae	JU108	Late L3	SS in div	No	69.1224	40.0838	21.6778	3.75515	11.5863	23.5232	28.3698	19.1881	18.6572	12.3067	11.7332
O. tipulae	JU108	Late L3	SS div	No	70.5116	33.3608	20.8312	3.77835	15.6379	51.6302	39.826	16.6637	15.692	14.701	28.9974
O. tipulae	JU108	Late L3	SS in div	No	70.607	40.817	19.9601	4.68041	11.9227	20.8338	24.6198	22.5657	17.6611	14.9175	8.99613
O. tipulae	JU108	Late L3	SS div	No	71.3441	31.2371	16.4781	5.60954	16.7229	21.8041	42.4381	14.9768	17.2345	14.3518	3.44072
O. tipulae	JU108	Late L3	SS div	No	71.3737	46.2384	23.3776	2.52191	7.35052	40.9265	25.3157	23.076	23.7358	6.67784	34.366
O. tipulae	JU108	Late L3	SS in div	No	71.4936	37.3131	24.7616	4.61856	9.99098	21.4536	30.9111	1.71005	7.0451	5.38918	3.32474
O. tipulae	JU108	Late L3	SS div	No	71.8479	36.4085	18.366	4.8634	17.6044	49.3879	37.0168	18.5425	16.4278	18.0644	32.3557
O. tipulae	JU108	Late L3	SS div	No	72.3557	50.0863	20.0052	4.32732	10.1031	40.183	25.7577	23.7113	25.5477	10.1289	34.5064
O. tipulae	JU108	Late L3	SS div	No	72.4936	28.9304	16.0348	5.21778	16.5992	21.9369	43.8093	13.6688	15.6881	15.4433	5.52577
O. tipulae	JU108	Late L3	SS div	No	73.8737	42.5979	21.058	3.6134	9.30928	28.0399	25.3157	9.69459	11.0979	3.34278	9.45103
O. tipulae	JU108	Late L3	SS in div	No	75.2616	41.1405	24.058	5.49356	6.14433	20.607	30.4149	3.98582	4.43814	7.56959	3.75644
O. tipulae	JU108	Late L3	SS div	No	75.5309	27.6856	16.1869	7.83505	11.2281	21.4678	49.8441	10.5193	13.5644	9.41624	10.5374
O. tipulae	JU108	Late L3	SS div	No	76.3028	25.9961	16.0863	3.98196	10.5309	21.7938	47.5683	9.86985	11.5052	7.10052	7.19459
O. tipulae	JU108	Late L3	SS in div	No	76.6559	23.9072	17.1534	4.57861	7.39588	33.2113	23.9046	4.81701	6.24613	4.57474	7.07603
O. tipulae	JU108	Late L3	SS div	No	76.8093	40.4652	19.4742	4.65593	7.07474	26.75	28.1521	11.6637	9.91881	2.68686	5.6134
O. tipulae	JU108	Late L3	SS div	No	78.5142	28.241	13.7629	6.17397	14.2874	21.7358	53.018	12.9059	15.2951	6.59923	10.2113
O. tipulae	JU108	Late L3	SS div	No	79.0026	27.9794	19.5129	4.41624	11.1237	24.8492	45.4459	12.2668	14.9137	10.4742	6.82732
O. tipulae	JU108	Late L3	SS in div	No	79.1289	25.924	19.3724	5.66237	10.9152	35.2887	27.2281	4.39433	8.88531	7.71907	6.7616
O. tipulae	JU108	Late L3	SS div	No	81.8428	28.8492	17.8814	4.07345	9.37371	33.2165	53.393	10.6714	17.701	8.34665	23.6276
O. tipulae	JU108	Late L3	SS div	No	82.6649	34.7191	21.6843	4.18299	21.1985	29.143	41.8918	11.8402	27.8093	19.0954	14.0129
O. tipulae	JU108	Late L3	SS div	No	82.8454	28.3608	21.5515	6.36856	9.70619	30.0013	54.9485	9.24742	19.5825	7.3183	24.6289

## Sheet: Vulval fates in O. tipulae
At 23 °C
Oscheius tipulae
Genotype	P3p	P4p	P5p	P6p	P7p	P8p
WT(CEW1)	S	S	uuuu	tttt	uuuu	ssss
WT(CEW1)	S	S	uuuu	tttt	uuuu	ssss
WT(CEW1)	S	S	uuuu	tttt	uuuu	ssss
WT(CEW1)	S	SS	uuuu	tttt	uuuu	ssss
WT(CEW1)	S	SS	uuuu	tttt	uuuu	ssss
WT(CEW1)	S	ssss	uuuu	tttt	uuuu	ssS
WT(CEW1)	S	ssss	uuuu	tttt	uuuu	SS
WT(CEW1)	S	ssss	uuuu	tttt	uuuu	ssss
WT(CEW1)	S	ssss	uuuu	tttt	uuuu	ssss
WT(CEW1)	S	ssss	uuuu	tttt	uuuu	ssss
WT(CEW1)	S	ssss	uuuu	tttt	uuuu	ssss
WT(CEW1)	S	ssss	uuuu	tttt	uuuu	ssss
WT(CEW1)	S	ssss	uuuu	tttt	uuuu	ssss
WT(CEW1)	S	ssss	uuuu	tttt	uuuu	ssss
WT(CEW1)	S	ssss	uuuu	tttt	uuuu	ssss
WT(CEW1)	S	ssss	uuuu	tttt	uuuu	ssss
WT(CEW1)	S	ssss	uuuu	tttt	uuuu	ssss
WT(CEW1)	S	ssss	uuuu	tttt	uuuu	ssss
WT(CEW1)	S	ssss	uuuu	tttt	uuuu	ssss
WT(CEW1)	S	ssss	uuuu	tttt	uuuu	ssss
WT(CEW1)	S	ssss	uuuu	tttt	uuuu	ssss
WT(CEW1)	S	ssss	uuuu	tttt	uuuu	ssss
WT(CEW1)	S	ssss	uuuu	tttt	uuuu	ssss
WT(CEW1)	S	ssss	uuuu	tttt	uuuu	ssss
WT(CEW1)	S	ssss	uuuu	tttt	uuuu	ssss
WT(CEW1)	S	ssss	uuuu	tttt	uuuu	ssss
WT(CEW1)	S	ssss	uuuu	tttt	uuuu	ssss
WT(CEW1)	S	ssss	uuuu	tttt	uuuu	ssss
WT(CEW1)	S	ssss	uuuu	tttt	uuuu	ssss
WT(CEW1)	S	ssss	uuuu	tttt	uuuu	ssss
WT(CEW1)	S	ssss	uuuu	tttt	uuuu	ssss
WT(CEW1)	S	ssss	uuuu	tttt	uuuu	ssss
WT(CEW1)	S	ssss	uuuu	tttt	uuuu	ssss
WT(CEW1)	S	ssss	uuuu	tttt	uuuu	ssss
WT(CEW1)	S	ssss	uuuu	tttt	uuuu	ssss
WT(CEW1)	S	ssss	uuuu	tttt	uuuu	ssss
WT(CEW1)	S	ssss	uuuu	tttt	uuuu	ssss
WT(CEW1)	S	ssss	uuuu	tttt	uuuu	ssss
WT(CEW1)	S	ssss	uuuu	tttt	uuuu	ssss
WT(CEW1)	S	ssss	uuuu	tttt	uuuu	ssss
WT(CEW1)	S	ssss	uuuu	tttt	uuuu	ssss
WT(CEW1)	S	ssss	uuuu	tttt	uuuu	ssss
WT(CEW1)	S	ssss	uuuu	tttt	uuuu	ssss
WT(CEW1)	S	ssss	uuuu	tttt	uuuu	ssss
WT(CEW1)	S	ssss	uuuu	tttt	uuuu	ssss
WT(CEW1)	S	ssss	uuuu	tttt	uuuu	ssss
WT(CEW1)	S	ssss	uuuu	tttt	uuuu	ssss
WT(CEW1)	S	ssss	uuuu	tttt	uuuu	ssss
WT(CEW1)	S	ssss	uuuu	tttt	uuuu	ssss
WT(CEW1)	S	ssss	uuuu	tttt	uuuu	ssss
WT(CEW1)	S	ssss	uuuu	tttt	uuuu	ssss
WT(CEW1)	S	ssss	uuuu	tttt	uuuu	ssss
WT(CEW1)	S	ssss	uuuu	tttt	uuuu	ssss
WT(CEW1)	S	ssss	uuuu	tttt	uuuu	ssss
WT(CEW1)	S	ssss	uuuu	tttt	uuuu	ssss
WT(CEW1)	S	ssss	uuuu	tttt	uuuu	ssss
WT(CEW1)	S	ssss	uuuu	tttt	uuuu	ssss
WT(CEW1)	S	ssss	uuuu	tttt	uuuu	ssss
WT(CEW1)	S	ssss	uuuu	tttt	uuuu	ssss
WT(CEW1)	S	ssss	uuuu	tttt	uuuu	ssss
WT(CEW1)	S	ssss	uuuu	tttt	uuuu	ssss
WT(CEW1)	S	ssss	uuuu	tttt	uuuu	ssss
WT(CEW1)	S	ssss	uuuu	tttt	uuuu	ssss
WT(CEW1)	S	ssss	uuuu	tttt	uuuu	ssss
WT(CEW1)	S	ssss	uuuu	tttt	uuuu	ssss
WT(CEW1)	S	ssss	uuuu	tttt	uuuu	ssss
WT(CEW1)	S	ssss	uuuu	tttt	uuuu	ssss
WT(CEW1)	S	ssss	uuuu	tttt	uuuu	ssss
WT(CEW1)	S	ssss	uuuu	tttt	uuuu	ssss
WT(CEW1)	S	ssss	uuuu	tttt	uuuu	ssss
WT(CEW1)	S	ssss	uuuu	tttt	uuuu	ssss
WT(CEW1)	S	ssss	uuuu	tttt	uuuu	ssss
WT(CEW1)	S	ssss	uuuu	tttt	uuuu	ssss
WT(CEW1)	S	ssss	uuuu	tttt	uuuu	ssss
WT(CEW1)	S	ssss	uuuu	tttt	uuuu	ssss
WT(CEW1)	S	ssss	uuuu	tttt	uuuu	ssss
WT(CEW1)	S	ssss	uuuu	tttt	uuuu	ssss
WT(CEW1)	S	ssss	uuuu	tttt	uuuu	ssss
WT(CEW1)	S	ssss	uuuu	tttt	uuuu	ssss
WT(CEW1)	S	ssss	uuuu	tttt	uuuu	ssss
WT(CEW1)	S	ssss	uuuu	tttt	uuuu	ssss
WT(CEW1)	S	ssss	uuuu	tttt	uuuu	ssss
WT(CEW1)	S	ssss	uuuu	tttt	uuuu	ssss
WT(CEW1)	S	ssss	uuuu	tttt	uuuu	ssss
WT(CEW1)	S	ssss	uuuu	tttt	uuuu	ssss
WT(CEW1)	S	ssss	uuuu	tttt	uuuu	ssss
WT(CEW1)	S	ssss	uuuu	tttt	uuuu	ssss
WT(CEW1)	S	ssss	uuuu	tttt	uuuu	ssss
WT(CEW1)	S	ssss	uuuu	tttt	uuuu	ssss
WT(CEW1)	S	ssss	uuuu	tttt	uuuu	ssss
WT(CEW1)	S	ssss	uuuu	tttt	uuuu	ssss
WT(CEW1)	S	ssss	uuuu	tttt	uuuu	ssss
WT(CEW1)	S	ssss	uuuu	tttt	uuuu	ssss
WT(CEW1)	S	ssss	uuuu	tttt	uuuu	ssss
WT(CEW1)	S	ssss	uuuu	tttt	uuuu	ssss
WT(CEW1)	S	ssss	uuuu	tttt	uuuu	ssss
WT(CEW1)	S	ssss	uuuu	tttt	uuuu	ssss
WT(CEW1)	S	ssss	uuuu	tttt	uuuu	ssss
WT(CEW1)	S	ssss	uuuu	tttt	uuuu	ssss
WT(CEW1)	S	ssss	uuuu	tttt	uuuu	ssss
lin-3(mf113)	S	ssss	uuuu	duuu	ssss	ssss
lin-3(mf113)	S	ssss	uuuu	tttt	uuuu	ssss
lin-3(mf113)	S	ssss	uuuu	tttt	uuuu	ssss
lin-3(mf113)	S	ssss	uuuu	tttt	uuuu	ssss
lin-3(mf113)	S	ssss	uuuu	tttt	uuuu	ssss
lin-3(mf113)	S	ssss	uuuu	ttuu	uuuu	ssss
lin-3(mf113)	S	ssss	uuuu	tuuu	uuuu	ssss
lin-3(mf113)	S	ssss	uuuu	uttt	uuuu	ssss
lin-3(mf113)	S	ssss	uuuu	uttt	uuuu	ssss
lin-3(mf113)	S	ssss	uuuu	uttu	ssss	ssss
lin-3(mf113)	S	ssss	uuuu	uttu	uuuu	ssss
lin-3(mf113)	S	ssss	uuuu	uttu	uuuu	ssss
lin-3(mf113)	S	ssss	uuuu	uttu	uuss	ssss
lin-3(mf113)	S	ssss	uuuu	uttu	ssss	ssss
lin-3(mf113)	S	ssss	uuuu	utuu	uuuu	ssss
lin-3(mf113)	S	ssss	ssuu	uutt	uuuu	ssss
lin-3(mf113)	S	ssss	ssuu	uuuu	ssss	ssss
lin-3(mf113)	S	ssss	uuuu	uuuu	uuuu	ssss
lin-3(mf113)	S	ssss	ssss	uuuu	ssss	ssss
lin-3(mf113)	S	ssss	uuuu	uuuu	ssss	ssss
lin-3(mf113)	S	ssss	uuuu	uuuu	uuuu	ssss
lin-3(mf113)	S	SS	uuuu	uuuu	ssss	ssss
lin-3(mf113)	S	ssss	ssss	uuuu	ssss	ssss
lin-3(mf113)	S	ssss	uuuu	uuuu	uuuu	SS
lin-3(mf113)	S	ssss	uuuu	uuuu	uuuu	ssss
lin-3(mf113)	S	ssss	uuuu	uuuu	ssss	ssss
lin-3(mf113)	S	ssss	uuuu	uuuu	ssss	ssss
lin-3(mf113)	S	ssss	uuuu	uuuu	uuuu	ssss
lin-3(mf113)	S	ssss	uuuu	uuuu	uuuu	ssss
lin-3(mf113)	S	ssss	uuuu	uuuu	uuuu	ssss
lin-3(mf113)	S	ssss	uuuu	uuuu	uuuu	ssss
lin-3(mf113)	S	ssss	uuuu	uuuu	uuuu	ssss
lin-3(mf113)	S	SS	ssss	uuuu	uuuu	ssss
lin-3(mf113)	S	ssss	ssss	uuuu	ssss	ssss
lin-3(mf113)	S	ssss	ssss	uuuu	ssss	ssss
lin-3(mf113)	S	ssss	uuuu	uuuu	uuuu	ssss
lin-3(mf113)	S	ssss	uuuu	uuuu	uuuu	ssss
lin-3(mf113)	S	uuuu	uuuu	uuuu	ssss	ssss
lin-3(mf113)	S	ssss	uuuu	uuuu	ssss	ssss
lin-3(mf113)	S	ssss	uuuu	uuuu	uuuu	ssss
lin-3(mf113)	S	ssss	uuuu	uuuu	uuus	ssss
lin-3(mf113)	S	ssss	suuu	uuuu	uuus	ssss
lin-3(mf113)	S	ssss	uuuu	uuuu	uuuu	ssss
lin-3(mf113)	S	ssss	uuuu	uuuu	ssss	ssss
lin-3(mf113)	S	ssss	uuuu	uuuu	uuuu	ssss
lin-3(mf113)	S	ssss	ssss	uuuu	ssss	ssss
lin-3(mf113)	S	ssss	uuuu	uuuu	ssss	ssss
lin-3(mf113)	S	ssss	uuuu	uuuu	uuuu	ssss
lin-3(mf113)	ssss	ssss	uuuu	uuuu	uuuu	ssss
lin-3(mf113)	S	ssss	ssss	uuuu	ssss	ssss
lin-3(mf113)	S	ssss	uuuu	uuuu	ssss	ssss
lin-3(mf113)	S	ssss	ssss	uuuu	SS	SS
lin-3(mf113)	S	ssss	ssss	uuuu	ssss	ssss
lin-3(mf113)	S	ssss	ssss	uuuu	ssss	SS
lin-3(mf113)	S	ssss	ssss	uuuu	ssss	ssss
lin-3(mf113)	S	ssss	uuuu	uuuu	ssss	ssss
lin-3(mf113)	S	ssss	ssss	uuuu	uuuu	ssss
lin-3(mf113)	S	ssss	uuuu	uuuu	uuuu	ssss
lin-3(mf113)	S	ssss	uuuu	uuuu	ssss	ssss
lin-3(mf113)	S	ssss	uuuu	uuuu	uuss	ssss
lin-3(mf113)	S	ssss	uuuu	uuuu	uuuu	ssss
lin-3(mf113)	ssss	ssss	uuuu	uuuu	uuuu	ssss
lin-3(mf113)	S	ssss	uuuu	uuuu	ssss	ssss
lin-3(mf113)	S	ssss	uuuu	uuuu	uuuu	ssss
lin-3(mf113)	S	S	uuuu	uuuu	ssss	ssss
lin-3(mf113)	S	ssss	uuuu	uuuu	uuuu	ssss
lin-3(mf113)	S	ssss	uuuu	uuuu	uuuu	ssss
lin-3(mf113)	S	ssss	ssuu	uuuu	uuss	ssss
lin-3(mf113)	S	ssss	uuuu	uuuu	uuuu	ssss
lin-3(mf113)	S	ssss	uuuu	uuuu	ssss	ssss
lin-3(mf113)	S	ssss	ssuu	uuuu	ssss	ssss
lin-3(mf113)	S	ssss	ssss	uuuu	ssss	ssss
lin-3(mf113)	S	ssss	uuuu	uuuu	ssss	ssss
lin-3(mf113)	S	ssss	uuuu	uuuu	uuuu	ssss
lin-3(mf113)	S	ssss	uuuu	uuuu	uuuu	ssss
lin-3(mf113)	S	ssss	uuuu	uuuu	uuus	ssss
lin-3(mf113)	S	ssss	uuuu	uuuu	uuuu	ssss
lin-3(mf113)	S	ssss	ssss	uuuu	uuuu	ssss
lin-3(mf113)	S	ssss	uuuu	uuuu	uuuu	ssss
lin-3(mf113)	S	ssss	ssss	uuuu	uuuu	ssss
lin-3(mf113)	S	ssss	ssss	uuuu	uuus	ssss
lin-3(mf113)	S	ssss	ssuu	uuuu	uuuu	ssss
lin-3(mf113)	S	ssss	uuuu	uuuu	uuss	ssss
lin-3(mf113)	S	ssss	uuuu	uuuu	ssss	ssss
lin-3(mf113)	S	ssss	uuuu	uuuu	uuuu	ssss
lin-3(mf113)	S	ssss	uuuu	uuuu	uuuu	ssss
lin-3(mf113)	S	ssss	ssss	uuuu	uuuu	ssss
lin-3(mf113)	S	ssss	uuuu	uuuu	uuuu	ssss
lin-3(mf113)	S	ssss	uuuu	uuuu	uuus	ssss
lin-3(mf113)	S	ssss	uuuu	uuuu	ssss	ssss
lin-3(mf113)	S	ssss	uuuu	uuuu	uuuu	ssss
lin-3(mf113)	S	ssss	ssuu	uuuu	uuss	ssss
lin-3(mf113)	S	ssss	uuuu	uuuu	uuuu	ssss
lin-3(mf113)	S	ssss	uuuu	uuuu	uuuu	ssss
lin-3(mf113)	S	ssss	uuuu	uuuu	ssss	ssss
lin-3(mf113)	S	ssss	uuuu	uuuu	uuuu	ssss
lin-3(mf113)	S	ssss	uuuu	uuuu	uuuu	ssss
lin-3(mf113)	S	ssss	uuuu	uuuu	uuuu	ssss
lin-3(mf113)	S	ssss	suuu	uuuu	uuuu	ssss
lin-3(mf113)	S	ssss	uuuu	uuuu	ssss	ssss
lin-3(mf114)	S	ssss	uuuu	tttt	uuuu	ssss
lin-3(mf114)	S	ssss	ssuu	tttt	uuss	ssss
lin-3(mf114)	S	ssss	uuuu	tttt	uuuu	ssss
lin-3(mf114)	S	ssss	uuuu	tttt	uuuu	ssss
lin-3(mf114)	S	ssss	uuuu	tttt	uuuu	ssss
lin-3(mf114)	S	ssss	uuuu	tttt	uuss	ssss
lin-3(mf114)	S	SS	uuuu	tttt	uuuu	ssss
lin-3(mf114)	S	ssss	uuuu	uttu	uuuu	ssss
lin-3(mf114)	S	ssss	ssss	uutt	uuss	ssss
lin-3(mf114)	S	ssss	uuuu	uuuu	uuuu	ssss
lin-3(mf114)	S	ssss	uuuu	uuuu	ssss	ssss
lin-3(mf114)	S	ssss	uuuu	uuuu	uuuu	ssss
lin-3(mf114)	S	ssss	ssuu	uuuu	uuuu	ssss
lin-3(mf114)	S	ssss	ssss	uuuu	ssss	ssss
lin-3(mf114)	S	ssss	uuuu	uuuu	uuuu	ssss
lin-3(mf114)	S	ssss	ssss	uuuu	ssss	ssss
lin-3(mf114)	S	ssss	uuuu	uuuu	uuss	ssss
lin-3(mf114)	S	ssss	uuuu	uuuu	uuuu	ssss
lin-3(mf114)	S	ssss	uuuu	uuuu	ssss	ssss
lin-3(mf114)	S	ssss	ssuu	uuuu	uuuu	ssss
mom-5(sy593); lin-3(mf86)	S	S	S	S	S	ssss
mom-5(sy593); lin-3(mf86)	S	S	ssss	ssss	SS	ssss
mom-5(sy593); lin-3(mf86)	S	S	SS	SS	S	ssss
mom-5(sy593); lin-3(mf86)	S	S	S	S	S	ssss
mom-5(sy593); lin-3(mf86)	S	S	S	S	S	ssss
mom-5(sy593); lin-3(mf86)	S	S	ssss	ssss	ssss	ssss
mom-5(sy593); lin-3(mf86)	S	ssss	ssss	SS	S	ssss
mom-5(sy593); lin-3(mf86)	S	ssss	ssss	SS	S	ssss
mom-5(sy593); lin-3(mf86)	S	S	S	S	S	ssss
mom-5(sy593); lin-3(mf86)	S	S	ssss	SS	S	ssss
mom-5(sy593); lin-3(mf86)	S	S	ssss	S	S	ssss
mom-5(sy593); lin-3(mf86)	S	S	ssss	S	S	ssss
mom-5(sy593); lin-3(mf86)	S	S	SS	SS	S	ssss
mom-5(sy593); lin-3(mf86)	S	SS	ssss	S	S	ssss
mom-5(sy593); lin-3(mf86)	S	S	S	S	S	SS
mom-5(sy593); lin-3(mf86)	S	S	S	S	S	SS
mom-5(sy593); lin-3(mf86)	S	S	SS	S	SS	SS
mom-5(sy593); lin-3(mf86)	S	S	S	S	S	SS
mom-5(sy593); lin-3(mf86)	S	S	S	S	S	SS
mom-5(sy593); lin-3(mf86)	S	S	ssss	SS	S	SS
mom-5(sy593); lin-3(mf86)	S	S	S	S	S	S
mom-5(sy593); lin-3(mf86)	S	S	S	S	S	S
mom-5(sy593); lin-3(mf86)	S	S	S	S	S	S
mom-5(sy593); lin-3(mf86)	S	S	S	S	S	S
mom-5(sy593); lin-3(mf86)	S	S	S	S	S	S
mom-5(sy593); lin-3(mf86)	S	S	S	S	S	S
mom-5(sy593); lin-3(mf86)	S	S	S	S	S	S
mom-5(sy593); lin-3(mf86)	S	S	S	S	S	S
mom-5(sy593); lin-3(mf86)	S	S	S	S	S	S
mom-5(sy593); lin-3(mf86)	S	ssss	ssss	ssss	S	S
mom-5(sy593); lin-3(mf86)	S	ssss	S	S	S	S

## Sheet: Vulval fates in C. elegans
At 20 °C
Caenorhabditis elegans
WT(N2)	SS	SS	LLTU	TTTT	UTLL	SS
WT(N2)	SS	SS	LLTU	TTTT	UTLL	SS
WT(N2)	SS	SS	LLTU	TTTT	UTLL	SS
WT(N2)	SS	SS	LLTU	TTTT	UTLL	SS
WT(N2)	SS	SS	LLTU	TTTT	UTLL	SS
WT(N2)	SS	SS	LLTU	TTTT	UTLL	SS
WT(N2)	SS	SS	LLTU	TTTT	UTLL	SS
WT(N2)	SS	SS	LLTU	TTTT	UTLL	SS
WT(N2)	SS	SS	LLTU	TTTT	UTLL	SS
WT(N2)	SS	SS	LLTU	TTTT	UTLL	SS
WT(N2)	SS	SS	LLTU	TTTT	UTLL	SS
WT(N2)	SS	SS	LLTU	TTTT	UTLL	SS
WT(N2)	SS	SS	LLTU	TTTT	UTLL	SS
WT(N2)	SS	SS	LLTU	TTTT	UTLL	SS
WT(N2)	SS	SS	LLTU	TTTT	UTLL	SS
WT(N2)	SS	SS	LLTU	TTTT	UTLL	SS
WT(N2)	SS	SS	LLTU	TTTT	UTLL	SS
WT(N2)	S	SS	LLTU	TTTT	UTLL	SS
WT(N2)	S	SS	LLTU	TTTT	UTLL	SS
WT(N2)	S	SS	LLTU	TTTT	UTLL	SS
WT(N2)	S	SS	LLTU	TTTT	UTLL	SS
WT(N2)	S	SS	LLTU	TTTT	UTLL	SS
WT(N2)	S	SS	LLTU	TTTT	UTLL	SS
WT(N2)	S	SS	LLTU	TTTT	UTLL	SS
WT(N2)	S	SS	LLTU	TTTT	UTLL	SS
WT(N2)	S	SS	LLTU	TTTT	UTLL	SS
WT(N2)	S	SS	LLTU	TTTT	UTLL	SS
WT(N2)	S	SS	LLTU	TTTT	UTLL	SS
WT(N2)	-	SS	LLTU	TTTT	UTLL	SS
WT(N2)	-	SS	LLTU	TTTT	UTLL	SS
WT(N2)	-	SS	LLTU	TTTT	UTLL	SS
WT(N2)	-	SS	LLTU	TTTT	UTLL	SS
WT(N2)	-	SS	LLTU	TTTT	UTLL	SS
WT(N2)	-	SS	LLTU	TTTT	UTLL	SS
WT(N2)	-	SS	LLTU	TTTT	UTLL	SS
WT(N2)	-	SS	LLTU	TTTT	UTLL	SS
WT(N2)	-	SS	LLTU	TTTT	UTLL	SS
WT(N2)	-	SS	LLTU	TTTT	UTLL	SS
WT(N2)	-	SS	LLTU	TTTT	UTLL	SS
WT(N2)	-	SS	LLTU	TTTT	UTLL	SS
WT(N2)	-	SS	LLTU	TTTT	UTLL	SS
WT(N2)	-	SS	LLTU	TTTT	UTLL	SS
WT(N2)	-	SS	LLTU	TTTT	UTLL	SS
WT(N2)	-	SS	LLTU	TTTT	UTLL	SS
WT(N2)	-	SS	LLTU	TTTT	UTLL	SS
WT(N2)	-	SS	LLTU	TTTT	UTLL	SS
WT(N2)	-	SS	LLTU	TTTT	UTLL	SS
WT(N2)	-	SS	LLTU	TTTT	UTLL	SS
WT(N2)	-	SS	LLTU	TTTT	UTLL	SS
WT(N2)	-	SS	LLTU	TTTT	UTLL	SS
WT(N2)	-	SS	LLTU	TTTT	UTLL	SS
WT(N2)	-	SS	LLTU	TTTT	UTLL	SS
WT(N2)	-	SS	LLTU	TTTT	UTLL	SS
WT(N2)	-	SS	LLTU	TTTT	UTLL	SS
WT(N2)	-	SS	LLTU	TTTT	UTLL	SS
WT(N2)	-	SS	LLTU	TTTT	UTLL	SS
WT(N2)	-	SS	LLTU	TTTT	UTLL	SS
WT(N2)	-	SS	LLTU	TTTT	UTLL	SS
WT(N2)	-	SS	LLTU	TTTT	UTLL	SS
WT(N2)	-	SS	LLTU	TTTT	UTLL	SS
WT(N2)	-	SS	LLTU	TTTT	UTLL	SS
WT(N2)	-	SS	LLTU	TTTT	UTLL	SS
WT(N2)	-	SS	LLTU	TTTT	UTLL	SS
WT(N2)	-	SS	LLTU	TTTT	UTLL	SS
WT(N2)	-	SS	LLTU	TTTT	UTLL	SS
WT(N2)	-	SS	LLTU	TTTT	UTLL	SS
WT(N2)	-	SS	LLTU	TTTT	UTLL	SS
WT(N2)	-	SS	LLTU	TTTT	UTLL	SS
WT(N2)	-	SS	LLTU	TTTT	UTLL	SS
WT(N2)	-	SS	LLTU	TTTT	UTLL	SS
WT(N2)	-	SS	LLTU	TTTT	UTLL	SS
WT(N2)	-	SS	LLTU	TTTT	UTLL	SS
WT(N2)	-	SS	LLTU	TTTT	UTLL	SS
WT(N2)	-	SS	LLTU	TTTT	UTLL	SS
WT(N2)	-	SS	LLTU	TTTT	UTLL	SS
WT(N2)	-	SS	LLTU	TTTT	UTLL	SS
WT(N2)	-	SS	LLTU	TTTT	UTLL	SS
WT(N2)	-	SS	LLTU	TTTT	UTLL	SS
WT(N2)	-	SS	LLTU	TTTT	UTLL	SS
WT(N2)	-	SS	LLTU	TTTT	UTLL	SS
WT(N2)	-	SS	LLTU	TTTT	UTLL	SS
WT(N2)	-	SS	LLTU	TTTT	UTLL	SS
WT(N2)	-	SS	LLTU	TTTT	UTLL	SS
WT(N2)	-	SS	LLTU	TTTT	UTLL	SS
WT(N2)	-	SS	LLTU	TTTT	UTLL	SS
WT(N2)	-	SS	LLTU	TTTT	UTLL	SS
WT(N2)	-	SS	LLTU	TTTT	UTLL	SS
WT(N2)	-	SS	LLTU	TTTT	UTLL	SS
WT(N2)	-	SS	LLTU	TTTT	UTLL	SS
WT(N2)	-	SS	LLTU	TTTT	UTLL	SS
WT(N2)	-	SS	LLTU	TTTT	UTLL	SS
WT(N2)	-	SS	LLTU	TTTT	UTLL	SS
WT(N2)	-	SS	LLTU	TTTT	UTLL	SS
WT(N2)	-	SS	LLTU	TTTT	UTLL	SS
WT(N2)	-	SS	LLTU	TTTT	UTLL	SS
WT(N2)	-	SS	LLTU	TTTT	UTLL	SS
WT(N2)	-	SS	LLTU	TTTT	UTLL	SS
WT(N2)	-	SS	LLTU	TTTT	UTLL	SS
WT(N2)	-	SS	LLTU	TTTT	UTLL	SS
WT(N2)	-	SS	LLTU	TTTT	UTLL	SS
WT(N2)	-	SS	LLTU	TTTT	UTLL	SS
WT(N2)	-	SS	LLTU	TTTT	UTLL	SS
WT(N2)	-	SS	LLTU	TTTT	UTLL	SS
WT(N2)	-	SS	LLTU	TTTT	UTLL	SS
WT(N2)	-	SS	LLTU	TTTT	UTLL	SS
WT(N2)	-	SS	LLTU	TTTT	UTLL	SS
WT(N2)	-	SS	LLTU	TTTT	UTLL	SS
WT(N2)	-	SS	LLTU	TTTT	UTLL	SS
WT(N2)	-	SS	LLTU	TTTT	UTLL	SS
WT(N2)	-	SS	LLTU	TTTT	UTLL	SS
WT(N2)	-	SS	LLTU	TTTT	UTLL	SS
WT(N2)	-	SS	LLTU	TTTT	UTLL	SS
WT(N2)	-	SS	LLTU	TTTT	UTLL	SS
WT(N2)	-	SS	LLTU	TTTT	UTLL	SS
WT(N2)	-	SS	LLTU	TTTT	UTLL	SS
WT(N2)	-	SS	LLTU	TTTT	UTLL	SS
WT(N2)	-	SS	LLTU	TTTT	UTLL	SS
WT(N2)	-	SS	LLTU	TTTT	UTLL	SS
WT(N2)	-	SS	LLTU	TTTT	UTLL	SS
WT(N2)	-	SS	LLTU	TTTT	UTLL	SS
WT(N2)	-	SS	LLTU	TTTT	UTLL	SS
WT(N2)	-	SS	LLTU	TTTT	UTLL	SS
WT(N2)	-	SS	LLTU	TTTT	UTLL	SS
WT(N2)	-	SS	LLTU	TTTT	UTLL	SS
WT(N2)	-	SS	LLTU	TTTT	UTLL	SS
WT(N2)	-	SS	LLTU	TTTT	UTLL	SS
plx-1(nc37)	SS	SS	LLTU	TTTT	UTLL	SS
plx-1(nc37)	SS	SS	LLTU	TTTT	UTLL	SS
plx-1(nc37)	SS	SS	LLTU	TTTT	UTLL	SS
plx-1(nc37)	SS	SS	LLTU	TTTT	UTLL	SS
plx-1(nc37)	SS	SS	LLTU	TTTT	UTLL	SS
plx-1(nc37)	SS	SS	LLTU	TTTT	UTLL	SS
plx-1(nc37)	SS	SS	LLTU	TTTT	UTLL	SS
plx-1(nc37)	SS	SS	LLTU	TTTT	UTLL	SS
plx-1(nc37)	SS	SS	LLTU	TTTT	UTLL	SS
plx-1(nc37)	SS	SS	LLTU	TTTT	UTLL	SS
plx-1(nc37)	SS	SS	LLTU	TTTT	UTLL	SS
plx-1(nc37)	SS	SS	LLTU	TTTT	UTLL	SS
plx-1(nc37)	S	SS	LLTU	TTTT	UTLL	SS
plx-1(nc37)	S	SS	LLTU	TTTT	UTLL	SS
plx-1(nc37)	S	SS	LLTU	TTTT	UTLL	SS
plx-1(nc37)	S	SS	LLTU	TTTT	UTLL	SS
plx-1(nc37)	S	SS	LLTU	TTTT	UTLL	SS
plx-1(nc37)	S	SS	LLTU	TTTT	UTLL	SS
plx-1(nc37)	S	SS	LLTU	TTTT	UTLL	SS
plx-1(nc37)	S	SS	LLTU	TTTT	UTLL	SS
plx-1(nc37)	S	SS	LLTU	TTTT	UTLL	SS
plx-1(nc37)	S	SS	LLTU	TTTT	UTLL	SS
plx-1(nc37)	S	SS	LLTU	TTTT	UTLL	SS
plx-1(nc37)	-	SS	LLTU	TTTT	UTLL	SS
plx-1(nc37)	-	SS	LLTU	TTTT	UTLL	SS
plx-1(nc37)	-	SS	LLTU	TTTT	UTLL	SS
plx-1(nc37)	-	SS	LLTU	TTTT	UTLL	SS
plx-1(nc37)	-	SS	LLTU	TTTT	UTLL	SS
plx-1(nc37)	-	SS	LLTU	TTTT	UTLL	SS
plx-1(nc37)	-	SS	LLTU	TTTT	UTLL	SS
plx-1(nc37)	-	SS	LLTU	TTTT	UTLL	SS
plx-1(nc37)	-	SS	LLTU	TTTT	UTLL	SS
plx-1(nc37)	-	SS	LLTU	TTTT	UTLL	SS
plx-1(nc37)	-	SS	LLTU	TTTT	UTLL	SS
plx-1(nc37)	-	SS	LLTU	TTTT	UTLL	SS
plx-1(nc37)	-	SS	LLTU	TTTT	UTLL	SS
plx-1(nc37)	-	SS	LLTU	TTTT	UTLL	SS
plx-1(nc37)	-	SS	LLTU	TTTT	UTLL	SS
plx-1(nc37)	-	SS	LLTU	TTTT	UTLL	SS
plx-1(nc37)	-	SS	LLTU	TTTT	UTLL	SS
plx-1(nc37)	-	SS	LLTU	TTTT	UTLL	SS
plx-1(nc37)	-	SS	LLTU	TTTT	UTLL	SS
plx-1(nc37)	-	SS	LLTU	TTTT	UTLL	SS
plx-1(nc37)	-	SS	LLTU	TTTT	UTLL	SS
plx-1(nc37)	-	SS	LLTU	TTTT	UTLL	SS
plx-1(nc37)	-	SS	LLTU	TTTT	UTLL	SS
plx-1(nc37)	-	SS	LLTU	TTTT	UTLL	SS
plx-1(nc37)	-	SS	LLTU	TTTT	UTLL	SS
plx-1(nc37)	-	SS	LLTU	TTTT	UTLL	SS
plx-1(nc37)	-	SS	LLTU	TTTT	UTLL	SS
plx-1(nc37)	-	SS	LLTU	TTTT	UTLL	SS
plx-1(nc37)	-	SS	LLTU	TTTT	UTLL	SS
plx-1(nc37)	-	SS	LLTU	TTTT	UTLL	SS
plx-1(nc37)	-	SS	LLTU	TTTT	UTLL	SS
plx-1(nc37)	-	SS	LLTU	TTTT	UTLL	SS
plx-1(nc37)	-	SS	LLTU	TTTT	UTLL	SS
plx-1(nc37)	-	SS	LLTU	TTTT	UTLL	SS
plx-1(nc37)	-	SS	LLTU	TTTT	UTLL	SS
plx-1(nc37)	-	SS	LLTU	TTTT	UTLL	SS
plx-1(nc37)	-	SS	LLTU	TTTT	UTLL	SS
plx-1(nc37)	-	SS	LLTU	TTTT	UTLL	SS
plx-1(nc37)	-	SS	LLTU	TTTT	UTLL	SS
plx-1(nc37)	-	SS	LLTU	TTTT	UTLL	SS
plx-1(nc37)	-	SS	LLTU	TTTT	UTLL	SS
plx-1(nc37)	-	SS	LLTU	TTTT	UTLL	SS
plx-1(nc37)	-	SS	LLTU	TTTT	UTLL	SS
plx-1(nc37)	-	SS	LLTU	TTTT	UTLL	SS
plx-1(nc37)	-	SS	LLTU	TTTT	UTLL	SS
plx-1(nc37)	-	SS	LLTU	TTTT	UTLL	SS
plx-1(nc37)	-	SS	LLTU	TTTT	UTLL	SS
plx-1(nc37)	-	SS	LLTU	TTTT	UTLL	SS
plx-1(nc37)	-	SS	LLTU	TTTT	UTLL	SS
plx-1(nc37)	-	SS	LLTU	TTTT	UTLL	SS
plx-1(nc37)	-	SS	LLTU	TTTT	UTLL	SS
plx-1(nc37)	-	SS	LLTU	TTTT	UTLL	SS
plx-1(nc37)	-	SS	LLTU	TTTT	UTLL	SS
plx-1(nc37)	-	SS	LLTU	TTTT	UTLL	SS
plx-1(nc37)	-	SS	LLTU	TTTT	UTLL	SS
plx-1(nc37)	-	SS	LLTU	TTTT	UTLL	SS
plx-1(nc37)	-	SS	LLTU	TTTT	UTLL	SS
plx-1(nc37)	-	SS	LLTU	TTTT	UTLL	SS
plx-1(nc37)	-	SS	LLTU	TTTT	UTLL	SS
plx-1(nc37)	-	SS	LLTU	TTTT	UTLL	SS
plx-1(nc37)	-	SS	LLTU	TTTT	UTLL	SS
plx-1(nc37)	-	SS	LLTU	TTTT	UTLL	SS
plx-1(nc37)	-	SS	LLTU	TTTT	UTLL	SS
plx-1(nc37)	-	SS	LLTU	TTTT	UTLL	SS
plx-1(nc37)	-	SS	LLTU	TTTT	UTLL	SS
plx-1(nc37)	-	SS	LLTU	TTTT	UTLL	SS
plx-1(nc37)	-	SS	LLTU	TTTT	UTLL	SS
plx-1(nc37)	-	SS	LLTU	TTTT	UTLL	SS
plx-1(nc37)	-	SS	LLTU	TTTT	UTLL	SS
plx-1(nc37)	-	SS	LLTU	TTTT	UTLL	SS
plx-1(nc37)	-	SS	LLTU	TTTT	UTLL	SS
plx-1(nc37)	-	SS	LLTU	TTTT	UTLL	SS
plx-1(nc37)	-	SS	LLTU	TTTT	UTLL	SS
plx-1(nc37)	-	SS	LLTU	TTTT	UTLL	SS
plx-1(nc37)	-	SS	LLTU	TTTT	UTLL	SS
plx-1(nc37)	-	SS	LLTU	TTTT	UTLL	SS
plx-1(nc37)	-	SS	LLTU	TTTT	UTLL	SS
plx-1(nc37)	-	SS	LLTU	TTTT	UTLL	SS
plx-1(nc37)	-	SS	LLTU	TTTT	UTLL	SS
plx-1(nc37)	-	SS	LLTU	TTTT	UTLL	SS
plx-1(nc37)	-	SS	LLTU	TTTT	UTLL	SS
plx-1(nc37)	-	SS	LLTU	TTTT	UTLL	SS
plx-1(nc37)	-	SS	LLTU	TTTT	UTLL	SS
plx-1(nc37)	-	SS	LLTU	TTTT	UTLL	SS
plx-1(nc37)	-	SS	LLTU	TTTT	UTLL	SS
plx-1(nc37)	-	SS	LLTU	TTTT	UTLL	SS
plx-1(nc37)	-	SS	LLTU	TTTT	UTLL	SS
plx-1(nc37)	-	SS	SS	LLTU	TTTT	UTLL
plx-1(nc37)	-	SS	LLTU	TTTT	UUTLL	SS
plx-1(nc37)	-	SS	LLTU	TTTT	UUTLL	SS
plx-1(nc37)	-	SS	LLTU	TTTT	UUTLL	SS
plx-1(nc37)	-	SS	LLTTU	TTTT	UTLL	SS
plx-1(nc37)	-	SS	LLDDDU	TTTT	UTLL	SS
plx-1(nc37)	-	SS	LLTU	TTTT	|Gap|UTLL	SS
plx-1(nc37)	-	SS	LLTU	TTTT	SS	SS
plx-1(nc37)	-	SS	LLTU	TTTT	SS	SS
plx-1(nc37)	-	SSUU	LLTU	TTTT	UTLL	SS
plx-1(ev724);ajm-1::GFP	-	SS	LLTU	TTTT	UTLL	SS
plx-1(ev724);ajm-1::GFP	-	SS	LLTU	TTTT	UTLL	SS
plx-1(ev724);ajm-1::GFP	-	SS	LLTU	TTTT	UTLL	SS
plx-1(ev724);ajm-1::GFP	-	SS	LLTU	TTTT	UTLL	SS
plx-1(ev724);ajm-1::GFP	-	SS	LLTU	TTTT	UTLL	SS
plx-1(ev724);ajm-1::GFP	-	SS	LLTU	TTTT	UTLL	SS
plx-1(ev724);ajm-1::GFP	-	SS	LLTU	TTTT	UTLL	SS
plx-1(ev724);ajm-1::GFP	-	SS	LLTU	TTTT	UTLL	SS
plx-1(ev724);ajm-1::GFP	-	SS	LLTU	TTTT	UTLL	SS
plx-1(ev724);ajm-1::GFP	-	SS	LLTU	TTTT	UTLL	SS
plx-1(ev724);ajm-1::GFP	-	SS	LLTU	TTTT	UTLL	SS
plx-1(ev724);ajm-1::GFP	-	SS	LLTU	TTTT	UTLL	SS
plx-1(ev724);ajm-1::GFP	-	SS	LLTU	TTTT	UTLL	SS
plx-1(ev724);ajm-1::GFP	-	SS	LLTU	TTTT	UTLL	SS
plx-1(ev724);ajm-1::GFP	-	SS	LLTU	TTTT	UTLL	SS
plx-1(ev724);ajm-1::GFP	-	SS	LLTU	TTTT	UTLL	SS
plx-1(ev724);ajm-1::GFP	-	SS	LLTU	TTTT	UTLL	SS
plx-1(ev724);ajm-1::GFP	-	SS	LLTU	TTTT	UTLL	SS
plx-1(ev724);ajm-1::GFP	-	SS	LLTU	TTTT	UTLL	SS
plx-1(ev724);ajm-1::GFP	-	SS	LLTU	TTTT	UTLL	SS
plx-1(ev724);ajm-1::GFP	-	SS	LLTU	TTTT	UTLL	SS
plx-1(ev724);ajm-1::GFP	-	SS	LLTU	TTTT	UTLL	SS
plx-1(ev724);ajm-1::GFP	-	SS	LLTU	TTTT	UTLL	SS
plx-1(ev724);ajm-1::GFP	-	SS	LLTU	TTTT	UTLL	SS
plx-1(ev724);ajm-1::GFP	-	SS	LLTU	TTTT	UTLL	SS
plx-1(ev724);ajm-1::GFP	-	SS	LLTU	TTTT	UTLL	SS
plx-1(ev724);ajm-1::GFP	-	SS	LLTU	TTTT	UTLL	SS
plx-1(ev724);ajm-1::GFP	-	SS	LLTU	TTTT	UTLL	SS
plx-1(ev724);ajm-1::GFP	-	SS	LLTU	TTTT	UTLL	SS
plx-1(ev724);ajm-1::GFP	-	SS	LLTU	TTTT	UTLL	SS
plx-1(ev724);ajm-1::GFP	-	SS	LLTU	TTTT	UTLL	SS
plx-1(ev724);ajm-1::GFP	-	SS	LLTU	TTTT	UTLL	SS
plx-1(ev724);ajm-1::GFP	-	SS	LLTU	TTTT	UTLL	SS
plx-1(ev724);ajm-1::GFP	-	SS	LLTU	TTTT	UTLL	SS
plx-1(ev724);ajm-1::GFP	-	SS	LLTU	TTTT	UTLL	SS
plx-1(ev724);ajm-1::GFP	-	SS	LLTU	TTTT	UTLL	SS
plx-1(ev724);ajm-1::GFP	-	SS	LLTU	TTTT	UTLL	SS
plx-1(ev724);ajm-1::GFP	-	SS	LLTU	TTTT	UTLL	SS
plx-1(ev724);ajm-1::GFP	-	SS	LLTU	TTTT	UTLL	SS
plx-1(ev724);ajm-1::GFP	-	SS	LLTU	TTTT	UTLL	SS
plx-1(ev724);ajm-1::GFP	-	SS	LLTU	TTTT	UTLL	SS
plx-1(ev724);ajm-1::GFP	-	SS	LLTU	TTTT	UTLL	SS
plx-1(ev724);ajm-1::GFP	-	SS	LLTU	TTTT	UTLL	SS
plx-1(ev724);ajm-1::GFP	-	SS	LLTU	TTTT	UTLL	SS
plx-1(ev724);ajm-1::GFP	-	SS	LLTU	TTTT	UTLL	SS
plx-1(ev724);ajm-1::GFP	-	SS	LLTU	TTTT	UTLL	SS
plx-1(ev724);ajm-1::GFP	-	SS	LLTU	TTTT	UTLL	SS
plx-1(ev724);ajm-1::GFP	-	SS	LLTU	TTTT	UTLL	SS
plx-1(ev724);ajm-1::GFP	-	SS	LLTU	TTTT	UTLL	SS
plx-1(ev724);ajm-1::GFP	-	SS	LLTU	TTTT	UTLL	SS
plx-1(ev724);ajm-1::GFP	-	SS	LLTU	TTTT	UTLL	SS
plx-1(ev724);ajm-1::GFP	-	SS	LLTU	TTTT	UTLL	SS
plx-1(ev724);ajm-1::GFP	-	SS	LLTU	TTTT	UTLL	SS
plx-1(ev724);ajm-1::GFP	-	SS	LLTU	TTTT	UTLL	SS
plx-1(ev724);ajm-1::GFP	-	SS	LLTU	TTTT	UTLL	SS
plx-1(ev724);ajm-1::GFP	-	SS	LLTU	TTTT	UTLL	SS
plx-1(ev724);ajm-1::GFP	-	SS	LLTU	TTTT	UTLL	SS
plx-1(ev724);ajm-1::GFP	-	SS	LLTU	TTTT	UTLL	SS
plx-1(ev724);ajm-1::GFP	-	SS	LLTU	TTTT	UTLL	SS
plx-1(ev724);ajm-1::GFP	-	SS	LLTU	TTTT	UTLL	SS
plx-1(ev724);ajm-1::GFP	-	SS	LLTU	TTTT	UTLL	SS
plx-1(ev724);ajm-1::GFP	-	SS	LLTU	TTTT	UTLL	SS
plx-1(ev724);ajm-1::GFP	-	SS	LLTU	TTTT	UTLL	SS
plx-1(ev724);ajm-1::GFP	-	SS	LLTU	TTTT	UTLL	SS
plx-1(ev724);ajm-1::GFP	-	SS	LLTU	TTTT	UTLL	SS
plx-1(ev724);ajm-1::GFP	-	SS	LLTU	TTTT	UTLL	SS
plx-1(ev724);ajm-1::GFP	-	SS	LLTU	TTTT	UTLL	SS
plx-1(ev724);ajm-1::GFP	-	SS	LLTU	TTTT	UTLL	SS
plx-1(ev724);ajm-1::GFP	-	SS	LLTU	TTTT	UTLL	SS
plx-1(ev724);ajm-1::GFP	-	SS	LLTU	TTTT	UTLL	SS
plx-1(ev724);ajm-1::GFP	-	SS	LLTU	TTTT	UTLL	SS
plx-1(ev724);ajm-1::GFP	-	SS	LLTU	TTTT	UTLL	SS
plx-1(ev724);ajm-1::GFP	-	SS	LLTU	TTTT	UTLL	SS
plx-1(ev724);ajm-1::GFP	-	SS	LLTU	TTTT	UTLL	SS
plx-1(ev724);ajm-1::GFP	-	SS	LLTU	TTTT	UTLL	SS
plx-1(ev724);ajm-1::GFP	-	SS	LLTU	TTTT	UTLL	SS
plx-1(ev724);ajm-1::GFP	-	SS	LLTU	TTTT	UTLL	SS
plx-1(ev724);ajm-1::GFP	-	SS	LLTU	TTTT	UTLL	SS
plx-1(ev724);ajm-1::GFP	-	SS	LLTU	TTTT	UTLL	SS
plx-1(ev724);ajm-1::GFP	-	SS	LLTU	TTTT	UTLL	SS
plx-1(ev724);ajm-1::GFP	-	SS	LLTU	TTTT	UTLL	SS
plx-1(ev724);ajm-1::GFP	-	SS	LLTU	TTTT	UTLL	SS
plx-1(ev724);ajm-1::GFP	-	SS	LLTU	TTTT	UTLL	SS
plx-1(ev724);ajm-1::GFP	-	SS	LLTU	TTTT	UTLL	SS
plx-1(ev724);ajm-1::GFP	-	SS	LLTU	TTTT	UTLL	SS
plx-1(ev724);ajm-1::GFP	-	SS	LLTU	TTTT	UTLL	SS
plx-1(ev724);ajm-1::GFP	-	SS	LLTU	TTTT	UTLL	SS
plx-1(ev724);ajm-1::GFP	-	SS	LLTU	TTTT	UTLL	SS
plx-1(ev724);ajm-1::GFP	-	SS	LLTU	TTTT	UTLL	SS
plx-1(ev724);ajm-1::GFP	-	SS	LLTU	TTTT	UTLL	SS
plx-1(ev724);ajm-1::GFP	-	SS	LLTU	TTTT	UTLL	SS
plx-1(ev724);ajm-1::GFP	-	SS	LLTU	TTTT	UTLL	SS
plx-1(ev724);ajm-1::GFP	-	SS	LLTU	TTTT	UTLL	SS
plx-1(ev724);ajm-1::GFP	-	SS	LLTU	TTTT	UTLL	SS
plx-1(ev724);ajm-1::GFP	-	SS	LLTU	TTTT	UTLL	SS
plx-1(ev724);ajm-1::GFP	-	SS	LLTU	TTTT	UTLL	SS
plx-1(ev724);ajm-1::GFP	-	SS	LLTU	TTTT	UTLL	SS
plx-1(ev724);ajm-1::GFP	-	SS	LLTU	TTTT	UTLL	SS
plx-1(ev724);ajm-1::GFP	-	SS	LLTU	TTTT	UTLL	SS
plx-1(ev724);ajm-1::GFP	-	SS	LLTU	TTTT	UTLL	SS
plx-1(ev724);ajm-1::GFP	-	SS	LLTU	TTTT	UTLL	SS
plx-1(ev724);ajm-1::GFP	-	SS	LLTU	TTTT	UTLL	SS
plx-1(ev724);ajm-1::GFP	-	SS	LLTU	TTTT	UTLL	SS
plx-1(ev724);ajm-1::GFP	-	SS	LLTU	TTTT	UTLL	SS
plx-1(ev724);ajm-1::GFP	-	SS	LLTU	TTTT	UTLL	SS
plx-1(ev724);ajm-1::GFP	-	SS	LLTU	TTTT	UTLL	SS
plx-1(ev724);ajm-1::GFP	-	SS	LLTU	TTTT	UTLL	SS
plx-1(ev724);ajm-1::GFP	-	SS	LLTU	TTTT	UTLL	SS
plx-1(ev724);ajm-1::GFP	-	SS	LLTU	TTTT	UTLL	SS
plx-1(ev724);ajm-1::GFP	-	SS	LLTU	TTTT	UTLL	SS
plx-1(ev724);ajm-1::GFP	-	SS	LLTU	TTTT	UTLL	SS
plx-1(ev724);ajm-1::GFP	-	SS	LLTU	TTTT	UTLL	SS
plx-1(ev724);ajm-1::GFP	-	SS	LLTU	TTTT	UTLL	SS
plx-1(ev724);ajm-1::GFP	-	SS	LLTU	TTTT	UTLL	SS
plx-1(ev724);ajm-1::GFP	-	SS	LLTU	TTTT	UTLL	SS
plx-1(ev724);ajm-1::GFP	-	SS	LLTU	TTTT	UTLL	SS
plx-1(ev724);ajm-1::GFP	-	SS	LLTU	TTTT	UTLL	SS
plx-1(ev724);ajm-1::GFP	-	SS	LLTU	TTTT	UTLL	SS
plx-1(ev724);ajm-1::GFP	-	SS	LLTU	TTTT	UTLL	SS
plx-1(ev724);ajm-1::GFP	-	SS	LLTU	TTTT	UTLL	SS
plx-1(ev724);ajm-1::GFP	-	SS	LLTU	TTTT	UTLL	SS
plx-1(ev724);ajm-1::GFP	-	SS	LLTU	TTTT	UTLL	SS
plx-1(ev724);ajm-1::GFP	-	SS	LLTU	TTTT	UTLL	SS
plx-1(ev724);ajm-1::GFP	-	SS	LLTU	TTTT	UTLL	SS
plx-1(ev724);ajm-1::GFP	-	SS	LLTU	TTTT	UTLL	SS
plx-1(ev724);ajm-1::GFP	-	SS	LLTU	TTTT	UTLL	SS
plx-1(ev724);ajm-1::GFP	-	SS	LLTU	TTTT	UTLL	SS
plx-1(ev724);ajm-1::GFP	-	SS	LLTU	TTTT	UTLL	SS
plx-1(ev724);ajm-1::GFP	-	SS	LLTU	TTTT	UTLL	SS
plx-1(ev724);ajm-1::GFP	-	SS	LLTU	TTTT	UTLL	SS
plx-1(ev724);ajm-1::GFP	-	SS	LLTU	TTTT	UTLL	SS
plx-1(ev724);ajm-1::GFP	-	SS	LLTU	TTTT	UTLL	SS
plx-1(ev724);ajm-1::GFP	-	SS	LLTU	TTTT	UUTLL	SS
plx-1(ev724);ajm-1::GFP	-	SS	LLTU	TTTT	UUTLL	SS
plx-1(ev724);ajm-1::GFP	-	SS	LLTU	TTTT	UUTLL	SS
plx-1(ev724);ajm-1::GFP	-	SS	LLTU|Gap|	TTTT	UTLL	SS
plx-1(ev724);ajm-1::GFP	-	SS	LLTU	TTTT	|Gap|UTLL	SS
plx-1(ev724);ajm-1::GFP	-	SS	LLTU	TTTT	|Gap|UTLL	SS
plx-1(ev724);ajm-1::GFP	-	SS	LLTU	TTTT	SS	SS
plx-1(ev724);ajm-1::GFP	-	SS	LLTU	TTTT	SS	SS
plx-1(ev724);ajm-1::GFP	-	SS	LLTU	TTTT	SS	SS
plx-1(ev724);ajm-1::GFP	-	SS	LLTU	TTTT	SS	SS
plx-1(ev724);ajm-1::GFP	-	SS	LLTU	TTTT	SS	SS
plx-1(ev724);ajm-1::GFP	-	SS	LLTU	TTTT	SS	SS
plx-1(ev724);ajm-1::GFP	-	SS	LLTU	TTTT	SS	SS
plx-1(ev724);ajm-1::GFP	-	SS	LLTU	TTTT	SS	SS
plx-1(ev724);ajm-1::GFP	-	SS	LLTU	TTTT	SS	SS
plx-1(ev724);ajm-1::GFP	-	SS	LLTU	TTTT	SS	SS
plx-1(ev724);ajm-1::GFP	-	SS	LLTU	TTTT	SS	SS
plx-1(ev724);ajm-1::GFP	-	SS	SS	LLTU	TTTT	SS
plx-1(ev724);ajm-1::GFP	-	SS	SS	LLTU	TTTT	SS
plx-1(ev724);ajm-1::GFP	-	SS	SS	LLTU	TTTT	SS
plx-1(ev724);ajm-1::GFP	-	SS	LLTU	TTTT	UT	SS
plx-1(ev724);ajm-1::GFP	-	SS	LLTU	TTTT	UT	SS
plx-1(ev724);ajm-1::GFP	-	SS	LLTU	TTTT	UT	SS
plx-1(ev724);ajm-1::GFP	-	SS	LTU	TTTT	UTLL	SS
plx-1(ev724);ajm-1::GFP	-	LLTU	LLTU	TTTT	SS	SS
plx-1(ev724);ajm-1::GFP	-	SS	SS	TTTT	UTLL	SS
plx-1(ev724);ajm-1::GFP	-	SS	LLTU	TTTT	UTLL	UTLL
plx-1(ev724);ajm-1::GFP	-	SS	LLTU	TTTT	UTLL	UTLL
plx-1(ev724);ajm-1::GFP	-	SS	LLTU	TTTT	UTLL	UTLL
plx-1(ev724);ajm-1::GFP	-	LLTU	LLTU	TTTT	UTLL	SS
plx-1(nc36)	-	SS	LLTU	TTTT	UTLL	SS
plx-1(nc36)	-	SS	LLTU	TTTT	UTLL	SS
plx-1(nc36)	-	SS	LLTU	TTTT	UTLL	SS
plx-1(nc36)	-	SS	LLTU	TTTT	UTLL	SS
plx-1(nc36)	-	SS	LLTU	TTTT	UTLL	SS
plx-1(nc36)	-	SS	LLTU	TTTT	UTLL	SS
plx-1(nc36)	-	SS	LLTU	TTTT	UTLL	SS
plx-1(nc36)	-	SS	LLTU	TTTT	UTLL	SS
plx-1(nc36)	-	SS	LLTU	TTTT	UTLL	SS
plx-1(nc36)	-	SS	LLTU	TTTT	UTLL	SS
plx-1(nc36)	-	SS	LLTU	TTTT	UTLL	SS
plx-1(nc36)	-	SS	LLTU	TTTT	UTLL	SS
plx-1(nc36)	-	SS	LLTU	TTTT	UTLL	SS
plx-1(nc36)	-	SS	LLTU	TTTT	UTLL	SS
plx-1(nc36)	-	SS	LLTU	TTTT	UTLL	SS
plx-1(nc36)	-	SS	LLTU	TTTT	UTLL	SS
plx-1(nc36)	-	SS	LLTU	TTTT	UTLL	SS
plx-1(nc36)	-	SS	LLTU	TTTT	UTLL	SS
plx-1(nc36)	-	SS	LLTU	TTTT	UTLL	SS
plx-1(nc36)	-	SS	LLTU	TTTT	UTLL	SS
plx-1(nc36)	-	SS	LLTU	TTTT	UTLL	SS
plx-1(nc36)	-	SS	LLTU	TTTT	UTLL	SS
plx-1(nc36)	-	SS	LLTU	TTTT	UTLL	SS
plx-1(nc36)	-	SS	LLTU	TTTT	UTLL	SS
plx-1(nc36)	-	SS	LLTU	TTTT	UTLL	SS
plx-1(nc36)	-	SS	LLTU	TTTT	UTLL	SS
plx-1(nc36)	-	SS	LLTU	TTTT	UTLL	SS
plx-1(nc36)	-	SS	LLTU	TTTT	UTLL	SS
plx-1(nc36)	-	SS	LLTU	TTTT	UTLL	SS
plx-1(nc36)	-	SS	LLTU	TTTT	UTLL	SS
plx-1(nc36)	-	SS	LLTU	TTTT	UTLL	SS
plx-1(nc36)	-	SS	LLTU	TTTT	UTLL	SS
plx-1(nc36)	-	SS	LLTU	TTTT	UTLL	SS
plx-1(nc36)	-	SS	LLTU	TTTT	UTLL	SS
plx-1(nc36)	-	SS	LLTU	TTTT	UTLL	SS
plx-1(nc36)	-	SS	LLTU	TTTT	UTLL	SS
plx-1(nc36)	-	SS	LLTU	TTTT	UTLL	SS
plx-1(nc36)	-	SS	LLTU	TTTT	UTLL	SS
plx-1(nc36)	-	SS	LLTU	TTTT	UTLL	SS
plx-1(nc36)	-	SS	LLTU	TTTT	UTLL	SS
plx-1(nc36)	-	SS	LLTU	TTTT	UTLL	SS
plx-1(nc36)	-	SS	LLTU	TTTT	UTLL	SS
plx-1(nc36)	-	SS	LLTU	TTTT	UTLL	SS
plx-1(nc36)	-	SS	LLTU	TTTT	UTLL	SS
plx-1(nc36)	-	SS	LLTU	TTTT	UTLL	SS
plx-1(nc36)	-	SS	LLTU	TTTT	UTLL	SS
plx-1(nc36)	-	SS	LLTU	TTTT	UTLL	SS
plx-1(nc36)	-	SS	LLTU	TTTT	LLLL	SS
plx-1(nc36)	-	SS	LLTU	TTTT	LLLL	SS
plx-1(nc36)	-	SS	LLDD	TTTT	UTLL	SS
plx-1(nc36)	-	SS	LLDD	TTTT	UTLL	SS
plx-1(nc36)	-	SS	LLDD	TTTT	UTLL	SS
plx-1(nc36)	-	SS	LLU	TTTT	UTLL	SS
plx-1(nc36)	-	SS	LLU	TTTT	UTLL	SS
plx-2(ev773) II; him-5(e1490) V	SS	SS	LLTU	TTTT	UTLL	SS
plx-2(ev773) II; him-5(e1490) V	SS	SS	LLTU	TTTT	UTLL	SS
plx-2(ev773) II; him-5(e1490) V	SS	SS	LLTU	TTTT	UTLL	SS
plx-2(ev773) II; him-5(e1490) V	SS	SS	LLTU	TTTT	UTLL	SS
plx-2(ev773) II; him-5(e1490) V	SS	SS	LLTU	TTTT	UTLL	SS
plx-2(ev773) II; him-5(e1490) V	SS	SS	LLTU	TTTT	UTLL	SS
plx-2(ev773) II; him-5(e1490) V	SS	SS	LLTU	TTTT	UTLL	SS
plx-2(ev773) II; him-5(e1490) V	SS	SS	LLTU	TTTT	UTLL	SS
plx-2(ev773) II; him-5(e1490) V	SS	SS	LLTU	TTTT	UTLL	SS
plx-2(ev773) II; him-5(e1490) V	SS	SS	LLTU	TTTT	UTLL	SS
plx-2(ev773) II; him-5(e1490) V	SS	SS	LLTU	TTTT	UTLL	SS
plx-2(ev773) II; him-5(e1490) V	SS	SS	LLTU	TTTT	UTLL	SS
plx-2(ev773) II; him-5(e1490) V	SS	SS	LLTU	TTTT	UTLL	SS
plx-2(ev773) II; him-5(e1490) V	SS	SS	LLTU	TTTT	UTLL	SS
plx-2(ev773) II; him-5(e1490) V	SS	SS	LLTU	TTTT	UTLL	SS
plx-2(ev773) II; him-5(e1490) V	SS	SS	LLTU	TTTT	UTLL	SS
plx-2(ev773) II; him-5(e1490) V	SS	SS	LLTU	TTTT	UTLL	SS
plx-2(ev773) II; him-5(e1490) V	SS	SS	LLTU	TTTT	UTLL	SS
plx-2(ev773) II; him-5(e1490) V	SS	SS	LLTU	TTTT	UTLL	SS
plx-2(ev773) II; him-5(e1490) V	SS	SS	LLTU	TTTT	UTLL	SS
plx-2(ev773) II; him-5(e1490) V	SS	SS	LLTU	TTTT	UTLL	SS
plx-2(ev773) II; him-5(e1490) V	SS	SS	LLTU	TTTT	UTLL	SS
plx-2(ev773) II; him-5(e1490) V	SS	SS	LLTU	TTTT	UTLL	SS
plx-2(ev773) II; him-5(e1490) V	SS	SS	LLTU	TTTT	UTLL	SS
plx-2(ev773) II; him-5(e1490) V	SS	SS	LLTU	TTTT	UTLL	SS
plx-2(ev773) II; him-5(e1490) V	SS	SS	LLTU	TTTT	UTLL	SS
plx-2(ev773) II; him-5(e1490) V	SS	SS	LLTU	TTTT	UTLL	SS
plx-2(ev773) II; him-5(e1490) V	SS	SS	LLTU	TTTT	UTLL	SS
plx-2(ev773) II; him-5(e1490) V	SS	SS	LLTU	TTTT	UTLL	SS
plx-2(ev773) II; him-5(e1490) V	SS	SS	LLTU	TTTT	UTLL	SS
plx-2(ev773) II; him-5(e1490) V	SS	SS	LLTU	TTTT	UTLL	SS
plx-2(ev773) II; him-5(e1490) V	SS	SS	LLTU	TTTT	UTLL	SS
plx-2(ev773) II; him-5(e1490) V	SS	SS	LLTU	TTTT	UTLL	SS
plx-2(ev773) II; him-5(e1490) V	SS	SS	LLTU	TTTT	UTLL	SS
plx-2(ev773) II; him-5(e1490) V	S	SS	LLTU	TTTT	UTLL	SS
plx-2(ev773) II; him-5(e1490) V	S	SS	LLTU	TTTT	UTLL	SS
plx-2(ev773) II; him-5(e1490) V	S	SS	LLTU	TTTT	UTLL	SS
plx-2(ev773) II; him-5(e1490) V	S	SS	LLTU	TTTT	UTLL	SS
plx-2(ev773) II; him-5(e1490) V	S	SS	LLTU	TTTT	UTLL	SS
plx-2(ev773) II; him-5(e1490) V	S	SS	LLTU	TTTT	UTLL	SS
plx-2(ev773) II; him-5(e1490) V	S	SS	LLTU	TTTT	UTLL	SS
plx-2(ev773) II; him-5(e1490) V	S	SS	LLTU	TTTT	UTLL	SS
plx-2(ev773) II; him-5(e1490) V	S	SS	LLTU	TTTT	UTLL	SS
plx-2(ev773) II; him-5(e1490) V	S	SS	LLTU	TTTT	UTLL	SS
plx-2(ev773) II; him-5(e1490) V	S	SS	LLTU	TTTT	UTLL	SS
plx-2(ev773) II; him-5(e1490) V	S	SS	LLTU	TTTT	UTLL	SS
plx-2(ev773) II; him-5(e1490) V	S	SS	LLTU	TTTT	UTLL	SS
plx-2(ev773) II; him-5(e1490) V	S	SS	LLTU	TTTT	UTLL	SS
plx-2(ev773) II; him-5(e1490) V	S	SS	LLTU	TTTT	UTLL	SS
plx-2(ev773) II; him-5(e1490) V	S	SS	LLTU	TTTT	UTLL	SS
plx-2(ev773) II; him-5(e1490) V	S	SS	LLTU	TTTT	UTLL	SS
plx-2(ev773) II; him-5(e1490) V	S	SS	LLTU	TTTT	UTLL	SS
plx-2(ev773) II; him-5(e1490) V	S	SS	LLTU	TTTT	UTLL	SS
plx-2(ev773) II; him-5(e1490) V	S	SS	LLTU	TTTT	UTLL	SS
plx-2(ev773) II; him-5(e1490) V	S	SS	LLTU	TTTT	UTLL	SS
plx-2(ev773) II; him-5(e1490) V	S	SS	LLTU	TTTT	UTLL	SS
plx-2(ev773) II; him-5(e1490) V	S	SS	LLTU	TTTT	UTLL	SS
plx-2(ev733) II; plx-1(ev724) jcIs1[ajm-1::GFP + unc-29 (+) + rol-6(su1006)] IV; him-5(e1490) V	-	SS	LLTU	TTTT	UTLL	SS
plx-2(ev733) II; plx-1(ev724) jcIs1[ajm-1::GFP + unc-29 (+) + rol-6(su1006)] IV; him-5(e1490) V	-	SS	LLTU	TTTT	UTLL	SS
plx-2(ev733) II; plx-1(ev724) jcIs1[ajm-1::GFP + unc-29 (+) + rol-6(su1006)] IV; him-5(e1490) V	-	SS	LLTU	TTTT	UTLL	SS
plx-2(ev733) II; plx-1(ev724) jcIs1[ajm-1::GFP + unc-29 (+) + rol-6(su1006)] IV; him-5(e1490) V	-	SS	LLTU	TTTT	UTLL	SS
plx-2(ev733) II; plx-1(ev724) jcIs1[ajm-1::GFP + unc-29 (+) + rol-6(su1006)] IV; him-5(e1490) V	-	SS	LLTU	TTTT	UTLL	SS
plx-2(ev733) II; plx-1(ev724) jcIs1[ajm-1::GFP + unc-29 (+) + rol-6(su1006)] IV; him-5(e1490) V	-	SS	LLTU	TTTT	UTLL	SS
plx-2(ev733) II; plx-1(ev724) jcIs1[ajm-1::GFP + unc-29 (+) + rol-6(su1006)] IV; him-5(e1490) V	-	SS	LLTU	TTTT	UTLL	SS
plx-2(ev733) II; plx-1(ev724) jcIs1[ajm-1::GFP + unc-29 (+) + rol-6(su1006)] IV; him-5(e1490) V	-	SS	LLTU	TTTT	UTLL	SS
plx-2(ev733) II; plx-1(ev724) jcIs1[ajm-1::GFP + unc-29 (+) + rol-6(su1006)] IV; him-5(e1490) V	-	SS	LLTU	TTTT	UTLL	SS
plx-2(ev733) II; plx-1(ev724) jcIs1[ajm-1::GFP + unc-29 (+) + rol-6(su1006)] IV; him-5(e1490) V	-	SS	LLTU	TTTT	UTLL	SS
plx-2(ev733) II; plx-1(ev724) jcIs1[ajm-1::GFP + unc-29 (+) + rol-6(su1006)] IV; him-5(e1490) V	-	SS	LLTU	TTTT	UTLL	SS
plx-2(ev733) II; plx-1(ev724) jcIs1[ajm-1::GFP + unc-29 (+) + rol-6(su1006)] IV; him-5(e1490) V	-	SS	LLTU	TTTT	UTLL	SS
plx-2(ev733) II; plx-1(ev724) jcIs1[ajm-1::GFP + unc-29 (+) + rol-6(su1006)] IV; him-5(e1490) V	-	SS	LLTU	TTTT	UTLL	SS
plx-2(ev733) II; plx-1(ev724) jcIs1[ajm-1::GFP + unc-29 (+) + rol-6(su1006)] IV; him-5(e1490) V	-	SS	LLTU	TTTT	UTLL	SS
plx-2(ev733) II; plx-1(ev724) jcIs1[ajm-1::GFP + unc-29 (+) + rol-6(su1006)] IV; him-5(e1490) V	-	SS	LLTU	TTTT	UTLL	SS
plx-2(ev733) II; plx-1(ev724) jcIs1[ajm-1::GFP + unc-29 (+) + rol-6(su1006)] IV; him-5(e1490) V	-	SS	LLTU	TTTT	UTLL	SS
plx-2(ev733) II; plx-1(ev724) jcIs1[ajm-1::GFP + unc-29 (+) + rol-6(su1006)] IV; him-5(e1490) V	-	SS	LLTU	TTTT	UTLL	SS
plx-2(ev733) II; plx-1(ev724) jcIs1[ajm-1::GFP + unc-29 (+) + rol-6(su1006)] IV; him-5(e1490) V	-	SS	LLTU	TTTT	UTLL	SS
plx-2(ev733) II; plx-1(ev724) jcIs1[ajm-1::GFP + unc-29 (+) + rol-6(su1006)] IV; him-5(e1490) V	-	SS	LLTU	TTTT	UTLL	SS
plx-2(ev733) II; plx-1(ev724) jcIs1[ajm-1::GFP + unc-29 (+) + rol-6(su1006)] IV; him-5(e1490) V	-	SS	LLTU	TTTT	UTLL	SS
plx-2(ev733) II; plx-1(ev724) jcIs1[ajm-1::GFP + unc-29 (+) + rol-6(su1006)] IV; him-5(e1490) V	-	SS	LLTU	TTTT	UTLL	SS
plx-2(ev733) II; plx-1(ev724) jcIs1[ajm-1::GFP + unc-29 (+) + rol-6(su1006)] IV; him-5(e1490) V	-	SS	LLTU	TTTT	UTLL	SS
plx-2(ev733) II; plx-1(ev724) jcIs1[ajm-1::GFP + unc-29 (+) + rol-6(su1006)] IV; him-5(e1490) V	-	SS	LLTU	TTTT	UTLL	SS
plx-2(ev733) II; plx-1(ev724) jcIs1[ajm-1::GFP + unc-29 (+) + rol-6(su1006)] IV; him-5(e1490) V	-	SS	LLTU	TTTT	UTLL	SS
plx-2(ev733) II; plx-1(ev724) jcIs1[ajm-1::GFP + unc-29 (+) + rol-6(su1006)] IV; him-5(e1490) V	-	SS	LLTU	TTTT	UTLL	SS
plx-2(ev733) II; plx-1(ev724) jcIs1[ajm-1::GFP + unc-29 (+) + rol-6(su1006)] IV; him-5(e1490) V	-	SS	LLTU	TTTT	UTLL	SS
plx-2(ev733) II; plx-1(ev724) jcIs1[ajm-1::GFP + unc-29 (+) + rol-6(su1006)] IV; him-5(e1490) V	-	SS	LLTU	TTTT	UTLL	SS
plx-2(ev733) II; plx-1(ev724) jcIs1[ajm-1::GFP + unc-29 (+) + rol-6(su1006)] IV; him-5(e1490) V	-	SS	LLTU	TTTT	UTLL	SS
plx-2(ev733) II; plx-1(ev724) jcIs1[ajm-1::GFP + unc-29 (+) + rol-6(su1006)] IV; him-5(e1490) V	-	SS	LLTU	TTTT	UTLL	SS
plx-2(ev733) II; plx-1(ev724) jcIs1[ajm-1::GFP + unc-29 (+) + rol-6(su1006)] IV; him-5(e1490) V	-	SS	LLTU	TTTT	UTLL	SS
plx-2(ev733) II; plx-1(ev724) jcIs1[ajm-1::GFP + unc-29 (+) + rol-6(su1006)] IV; him-5(e1490) V	-	SS	LLTU	TTTT	UTLL	SS
plx-2(ev733) II; plx-1(ev724) jcIs1[ajm-1::GFP + unc-29 (+) + rol-6(su1006)] IV; him-5(e1490) V	-	SS	LLTU	TTTT	UTLL	SS
plx-2(ev733) II; plx-1(ev724) jcIs1[ajm-1::GFP + unc-29 (+) + rol-6(su1006)] IV; him-5(e1490) V	-	SS	LLTU	TTTT	UTLL	SS
plx-2(ev733) II; plx-1(ev724) jcIs1[ajm-1::GFP + unc-29 (+) + rol-6(su1006)] IV; him-5(e1490) V	-	SS	LLTU	TTTT	UTLL	SS
plx-2(ev733) II; plx-1(ev724) jcIs1[ajm-1::GFP + unc-29 (+) + rol-6(su1006)] IV; him-5(e1490) V	-	SS	LLTU	TTTT	UTLL	SS
plx-2(ev733) II; plx-1(ev724) jcIs1[ajm-1::GFP + unc-29 (+) + rol-6(su1006)] IV; him-5(e1490) V	-	SS	LLTU	TTTT	UTLL	SS
plx-2(ev733) II; plx-1(ev724) jcIs1[ajm-1::GFP + unc-29 (+) + rol-6(su1006)] IV; him-5(e1490) V	-	SS	LLTU	TTTT	UTLL	SS
plx-2(ev733) II; plx-1(ev724) jcIs1[ajm-1::GFP + unc-29 (+) + rol-6(su1006)] IV; him-5(e1490) V	-	SS	LLTU	TTTT	UTLL	SS
plx-2(ev733) II; plx-1(ev724) jcIs1[ajm-1::GFP + unc-29 (+) + rol-6(su1006)] IV; him-5(e1490) V	-	SS	LLTU	TTTT	UTLL	SS
plx-2(ev733) II; plx-1(ev724) jcIs1[ajm-1::GFP + unc-29 (+) + rol-6(su1006)] IV; him-5(e1490) V	-	SS	LLTU	TTTT	UTLL	SS
plx-2(ev733) II; plx-1(ev724) jcIs1[ajm-1::GFP + unc-29 (+) + rol-6(su1006)] IV; him-5(e1490) V	-	SS	LLTU	TTTT	UTLL	SS
plx-2(ev733) II; plx-1(ev724) jcIs1[ajm-1::GFP + unc-29 (+) + rol-6(su1006)] IV; him-5(e1490) V	-	SS	LLTU	TTTT	UTLL	SS
plx-2(ev733) II; plx-1(ev724) jcIs1[ajm-1::GFP + unc-29 (+) + rol-6(su1006)] IV; him-5(e1490) V	-	SS	LLTU	TTTT	UTLL	SS
plx-2(ev733) II; plx-1(ev724) jcIs1[ajm-1::GFP + unc-29 (+) + rol-6(su1006)] IV; him-5(e1490) V	-	SS	LLTU	TTTT	UTLL	SS
plx-2(ev733) II; plx-1(ev724) jcIs1[ajm-1::GFP + unc-29 (+) + rol-6(su1006)] IV; him-5(e1490) V	-	SS	LLTU	TTTT	UTLL	SS
plx-2(ev733) II; plx-1(ev724) jcIs1[ajm-1::GFP + unc-29 (+) + rol-6(su1006)] IV; him-5(e1490) V	-	SS	LLTU	TTTT	UTLL	SS
plx-2(ev733) II; plx-1(ev724) jcIs1[ajm-1::GFP + unc-29 (+) + rol-6(su1006)] IV; him-5(e1490) V	-	SS	LLTU	TTTT	UTLL	SS
plx-1(mf159ev724) jcIs1 [ajm-1::GFP + unc-29 (+) + rol-6(su1006)] IV; him-5(e1490) V	S	SS	LLTU	TTTT	UTLLL	SS
plx-1(mf159ev724) jcIs1 [ajm-1::GFP + unc-29 (+) + rol-6(su1006)] IV; him-5(e1490) V	S	SS	LLTU	TTTT	UTLLL	SS
plx-1(mf159ev724) jcIs1 [ajm-1::GFP + unc-29 (+) + rol-6(su1006)] IV; him-5(e1490) V	S	SS	LLTU	TTTT	UTLLL	SS
plx-1(mf159ev724) jcIs1 [ajm-1::GFP + unc-29 (+) + rol-6(su1006)] IV; him-5(e1490) V	S	SS	LLTU	TTTT	UTLLL	SS
plx-1(mf159ev724) jcIs1 [ajm-1::GFP + unc-29 (+) + rol-6(su1006)] IV; him-5(e1490) V	S	SS	LLTU	TTTT	UTLLL	SS
plx-1(mf159ev724) jcIs1 [ajm-1::GFP + unc-29 (+) + rol-6(su1006)] IV; him-5(e1490) V	S	SS	LLTU	TTTT	SS	SS
plx-1(mf159ev724) jcIs1 [ajm-1::GFP + unc-29 (+) + rol-6(su1006)] IV; him-5(e1490) V	S	SS	LLTU	TTTT	UTLL	SS
plx-1(mf159ev724) jcIs1 [ajm-1::GFP + unc-29 (+) + rol-6(su1006)] IV; him-5(e1490) V	S	SS	LLTU	TTTT	UTLL	SS
plx-1(mf159ev724) jcIs1 [ajm-1::GFP + unc-29 (+) + rol-6(su1006)] IV; him-5(e1490) V	S	SS	LLTU	TTTT	UTLL	SS
plx-1(mf159ev724) jcIs1 [ajm-1::GFP + unc-29 (+) + rol-6(su1006)] IV; him-5(e1490) V	S	SS	LLTU	TTTT	UTLL	SS
plx-1(mf159ev724) jcIs1 [ajm-1::GFP + unc-29 (+) + rol-6(su1006)] IV; him-5(e1490) V	S	SS	LLTU	TTTT	UTLL	SS
plx-1(mf159ev724) jcIs1 [ajm-1::GFP + unc-29 (+) + rol-6(su1006)] IV; him-5(e1490) V	S	SS	LLTU	TTTT	UTLLL	SS
plx-1(mf159ev724) jcIs1 [ajm-1::GFP + unc-29 (+) + rol-6(su1006)] IV; him-5(e1490) V	S	SS	LLTU	TTTT	UTLLL	SS
plx-1(mf159ev724) jcIs1 [ajm-1::GFP + unc-29 (+) + rol-6(su1006)] IV; him-5(e1490) V	S	SS	LLTU	TTTT	UTLLL	SS
plx-1(mf159ev724) jcIs1 [ajm-1::GFP + unc-29 (+) + rol-6(su1006)] IV; him-5(e1490) V	S	SS	LLTU	TTTT	UTLL	SS
plx-1(mf159ev724) jcIs1 [ajm-1::GFP + unc-29 (+) + rol-6(su1006)] IV; him-5(e1490) V	S	SS	LLTU	TTTT	UTLL	SS
plx-1(mf159ev724) jcIs1 [ajm-1::GFP + unc-29 (+) + rol-6(su1006)] IV; him-5(e1490) V	S	SS	LLTU	TTTT	UTLL	SS
plx-1(mf159ev724) jcIs1 [ajm-1::GFP + unc-29 (+) + rol-6(su1006)] IV; him-5(e1490) V	S	SS	LLTU	TTTT	UTLL	SS
plx-1(mf159ev724) jcIs1 [ajm-1::GFP + unc-29 (+) + rol-6(su1006)] IV; him-5(e1490) V	S	SS	LLTU	TTTT	UTLL	SS
plx-1(mf159ev724) jcIs1 [ajm-1::GFP + unc-29 (+) + rol-6(su1006)] IV; him-5(e1490) V	S	SS	LLTU	TTTT	UTLL	SS
plx-1(mf159ev724) jcIs1 [ajm-1::GFP + unc-29 (+) + rol-6(su1006)] IV; him-5(e1490) V	S	SS	LLTU	TTTT	UTLL	SS
plx-1(mf159ev724) jcIs1 [ajm-1::GFP + unc-29 (+) + rol-6(su1006)] IV; him-5(e1490) V	S	SS	LLTU	TTTT	UTLL	SS
plx-1(mf159ev724) jcIs1 [ajm-1::GFP + unc-29 (+) + rol-6(su1006)] IV; him-5(e1490) V	S	SS	LLTU	TTTT	UTLL	SS
plx-1(mf159ev724) jcIs1 [ajm-1::GFP + unc-29 (+) + rol-6(su1006)] IV; him-5(e1490) V	S	SS	LLTU	TTTT	UTLL	SS
plx-1(mf159ev724) jcIs1 [ajm-1::GFP + unc-29 (+) + rol-6(su1006)] IV; him-5(e1490) V	SS	SS	LLTU	TTTT	UTLL	SS
plx-1(mf159ev724) jcIs1 [ajm-1::GFP + unc-29 (+) + rol-6(su1006)] IV; him-5(e1490) V	SS	SS	LLTU	TTTT	UTLL	SS
plx-1(mf159ev724) jcIs1 [ajm-1::GFP + unc-29 (+) + rol-6(su1006)] IV; him-5(e1490) V	SS	SS	LLTU	TTTT	UTLL|Gap|	SS
plx-1(mf159ev724) jcIs1 [ajm-1::GFP + unc-29 (+) + rol-6(su1006)] IV; him-5(e1490) V	SS	SS|Gap|	LLTU	TTTT	UTLL	SS
plx-1(mf159ev724) jcIs1 [ajm-1::GFP + unc-29 (+) + rol-6(su1006)] IV; him-5(e1490) V	SS	SS|Gap|	LLTU	TTTT	UTLL	SS
plx-1(mf159ev724) jcIs1 [ajm-1::GFP + unc-29 (+) + rol-6(su1006)] IV; him-5(e1490) V	SS	SS	LLTU	TTTT	UTLL	SS
plx-1(mf159ev724) jcIs1 [ajm-1::GFP + unc-29 (+) + rol-6(su1006)] IV; him-5(e1490) V	SS	SS	LLTU	TTTT	UTLL	SS
plx-1(mf159ev724) jcIs1 [ajm-1::GFP + unc-29 (+) + rol-6(su1006)] IV; him-5(e1490) V	SS	SS	LLTU	TTTT	UTLL	SS
plx-1(mf159ev724) jcIs1 [ajm-1::GFP + unc-29 (+) + rol-6(su1006)] IV; him-5(e1490) V	SS	SS	LLLTU	TTTTL	UTLL	SS
plx-1(mf159ev724) jcIs1 [ajm-1::GFP + unc-29 (+) + rol-6(su1006)] IV; him-5(e1490) V	SS	SS	LLTU	TTTT	UTLL	SS
plx-1(mf159ev724) jcIs1 [ajm-1::GFP + unc-29 (+) + rol-6(su1006)] IV; him-5(e1490) V	SS	SS	LLTU	TTTT	UTLL	SS
plx-1(mf159ev724) jcIs1 [ajm-1::GFP + unc-29 (+) + rol-6(su1006)] IV; him-5(e1490) V	SS	SS	LLTU	TTTT	UTLL	SS
plx-1(mf159ev724) jcIs1 [ajm-1::GFP + unc-29 (+) + rol-6(su1006)] IV; him-5(e1490) V	SS	SS	LLTU	TTTT	SS	SS
plx-1(mf159ev724) jcIs1 [ajm-1::GFP + unc-29 (+) + rol-6(su1006)] IV; him-5(e1490) V	SS	SS	LLTU	TTTT	UTLL	SS
plx-1(mf159ev724) jcIs1 [ajm-1::GFP + unc-29 (+) + rol-6(su1006)] IV; him-5(e1490) V	SS	SS	LLTU	TTTT	UTLL	SS
plx-1(mf159ev724) jcIs1 [ajm-1::GFP + unc-29 (+) + rol-6(su1006)] IV; him-5(e1490) V	SS	SS	LLTU	TTTT	UTLL	SS
plx-1(mf159ev724) jcIs1 [ajm-1::GFP + unc-29 (+) + rol-6(su1006)] IV; him-5(e1490) V	SS	SS	LLTU	TTTT	UTLL	SS
plx-1(mf159ev724) jcIs1 [ajm-1::GFP + unc-29 (+) + rol-6(su1006)] IV; him-5(e1490) V	SS	SS	LLTU	TTTT	UTLL	SS
plx-1(mf159ev724) jcIs1 [ajm-1::GFP + unc-29 (+) + rol-6(su1006)] IV; him-5(e1490) V	SS	SS	LLTU	TTTT	UTLL	SS
plx-1(mf159ev724) jcIs1 [ajm-1::GFP + unc-29 (+) + rol-6(su1006)] IV; him-5(e1490) V	SS	SS	LLTU	TTTT	UTLL	SS
plx-1(mf159ev724) jcIs1 [ajm-1::GFP + unc-29 (+) + rol-6(su1006)] IV; him-5(e1490) V	SS	SS	LLTU	TTTT	UTLL	SS
plx-1(mf159ev724) jcIs1 [ajm-1::GFP + unc-29 (+) + rol-6(su1006)] IV; him-5(e1490) V	SS	SS	LLTU	TTTT	UTLL	SS
plx-1(mf159ev724) jcIs1 [ajm-1::GFP + unc-29 (+) + rol-6(su1006)] IV; him-5(e1490) V	SS	SS	LLTU	TTTT	UTLL	SS
plx-1(mf159ev724) jcIs1 [ajm-1::GFP + unc-29 (+) + rol-6(su1006)] IV; him-5(e1490) V	SS	SS	LLTU	TTTT	UTLL	SS
plx-1(mf159ev724) jcIs1 [ajm-1::GFP + unc-29 (+) + rol-6(su1006)] IV; him-5(e1490) V	SS	SS	LLTU	TTTT	UTLL	SS
plx-1(mf159ev724) jcIs1 [ajm-1::GFP + unc-29 (+) + rol-6(su1006)] IV; him-5(e1490) V	SS	SS	LLTU	TTTT	UTLL	SS
plx-1(mf159ev724) jcIs1 [ajm-1::GFP + unc-29 (+) + rol-6(su1006)] IV; him-5(e1490) V	SS	SS	LLTU	TTTT	UTLL	SS
plx-1(mf159ev724) jcIs1 [ajm-1::GFP + unc-29 (+) + rol-6(su1006)] IV; him-5(e1490) V	SS	SS	LLTU	TTTT	UTLL	SS
plx-1(mf159ev724) jcIs1 [ajm-1::GFP + unc-29 (+) + rol-6(su1006)] IV; him-5(e1490) V	SS	SS	LLTU	TTTT	UTLL	SS
plx-1(mf159ev724) jcIs1 [ajm-1::GFP + unc-29 (+) + rol-6(su1006)] IV; him-5(e1490) V	SS	SS	LLTU	TTTT	UTLL|Gap|	SS
plx-1(mf159ev724) jcIs1 [ajm-1::GFP + unc-29 (+) + rol-6(su1006)] IV; him-5(e1490) V	SS	SS|Gap|	LLTU	TTTT	UTLL	SS
plx-1(mf159ev724) jcIs1 [ajm-1::GFP + unc-29 (+) + rol-6(su1006)] IV; him-5(e1490) V	SS	SS|Gap|	LLTU	TTTT	UTLL	SS
plx-1(mf159ev724) jcIs1 [ajm-1::GFP + unc-29 (+) + rol-6(su1006)] IV; him-5(e1490) V	SS	SS	LLTU	TTTT	UTLL	SS
plx-1(mf159ev724) jcIs1 [ajm-1::GFP + unc-29 (+) + rol-6(su1006)] IV; him-5(e1490) V	SS	SS	LLTU	TTTT	UTLL	SS
plx-1(mf159ev724) jcIs1 [ajm-1::GFP + unc-29 (+) + rol-6(su1006)] IV; him-5(e1490) V	SS	SS	LLTU	TTTT	UTLL	SS
plx-1(mf159ev724) jcIs1 [ajm-1::GFP + unc-29 (+) + rol-6(su1006)] IV; him-5(e1490) V	SS	SS	LLTU	TTTT	UTLL	SS
plx-1(mf159ev724) jcIs1 [ajm-1::GFP + unc-29 (+) + rol-6(su1006)] IV; him-5(e1490) V	SS	SS	LLTU	TTTT	SS	SS
plx-1(mf159ev724) jcIs1 [ajm-1::GFP + unc-29 (+) + rol-6(su1006)] IV; him-5(e1490) V	SS	SS	LLTU	TTTT	UTLL	SS
plx-1(mf159ev724) jcIs1 [ajm-1::GFP + unc-29 (+) + rol-6(su1006)] IV; him-5(e1490) V	SS	SS	LLTU	TTTT	UTLL	SS
plx-1(mf159ev724) jcIs1 [ajm-1::GFP + unc-29 (+) + rol-6(su1006)] IV; him-5(e1490) V	SS	SS	LLTU	TTTT	UTLL	SS
plx-1(mf159ev724) jcIs1 [ajm-1::GFP + unc-29 (+) + rol-6(su1006)] IV; him-5(e1490) V	SS	SS	LLTU	TTTT	UTLL	SS
plx-1(mf159ev724) jcIs1 [ajm-1::GFP + unc-29 (+) + rol-6(su1006)] IV; him-5(e1490) V	SS	SS	LLTU	TTTT	UTLL	SS
plx-1(mf159ev724) jcIs1 [ajm-1::GFP + unc-29 (+) + rol-6(su1006)] IV; him-5(e1490) V	SS	SS	LLTU	TTTT	UTLL	SS
plx-1(mf159ev724) jcIs1 [ajm-1::GFP + unc-29 (+) + rol-6(su1006)] IV; him-5(e1490) V	SS	SS	LLTU	TTTT	UTLL	SS
plx-1(mf159ev724) jcIs1 [ajm-1::GFP + unc-29 (+) + rol-6(su1006)] IV; him-5(e1490) V	SS	SS	LLTU	TTTT	UTLL	SS
plx-1(mf159ev724) jcIs1 [ajm-1::GFP + unc-29 (+) + rol-6(su1006)] IV; him-5(e1490) V	SS	SS	LLTU	TTTT	UTLL	SS
plx-1(mf159ev724) jcIs1 [ajm-1::GFP + unc-29 (+) + rol-6(su1006)] IV; him-5(e1490) V	SS	SS	LLTU	TTTT	UTLL	SS
plx-1(mf159ev724) jcIs1 [ajm-1::GFP + unc-29 (+) + rol-6(su1006)] IV; him-5(e1490) V	SS	SS	LLTU	TTTT	UTLL	SS
plx-1(mf159ev724) jcIs1 [ajm-1::GFP + unc-29 (+) + rol-6(su1006)] IV; him-5(e1490) V	SS	SS	LLTU	TTTT	UTLL	SS
plx-1(mf159ev724) jcIs1 [ajm-1::GFP + unc-29 (+) + rol-6(su1006)] IV; him-5(e1490) V	SS	SS	LLTU	TTTT	UTLL	SS
plx-1(mf159ev724) jcIs1 [ajm-1::GFP + unc-29 (+) + rol-6(su1006)] IV; him-5(e1490) V	SS	SS	LLTU	TTTT	UTLL	SS
plx-1(mf159ev724) jcIs1 [ajm-1::GFP + unc-29 (+) + rol-6(su1006)] IV; him-5(e1490) V	SS	SS	LLTU	TTTT|Gap|	SS	ULLL
plx-1(mf160ev724) jcIs1 [ajm-1::GFP + unc-29 (+) + rol-6(su1006)] IV; him-5(e1490) V	S	SS|Gap|	LLTU	TTTT	UTLL	SS
plx-1(mf160ev724) jcIs1 [ajm-1::GFP + unc-29 (+) + rol-6(su1006)] IV; him-5(e1490) V	S	SS	LLTU	TTTT	UTLL	SS
plx-1(mf160ev724) jcIs1 [ajm-1::GFP + unc-29 (+) + rol-6(su1006)] IV; him-5(e1490) V	S	SS	LLLTU	TTTTU-U	UTLL	SS
plx-1(mf160ev724) jcIs1 [ajm-1::GFP + unc-29 (+) + rol-6(su1006)] IV; him-5(e1490) V	S	SS	LLTU	TTTT	UTLL	SS
plx-1(mf160ev724) jcIs1 [ajm-1::GFP + unc-29 (+) + rol-6(su1006)] IV; him-5(e1490) V	S	SS	LLTU	TTTT	UTLL	SS
plx-1(mf160ev724) jcIs1 [ajm-1::GFP + unc-29 (+) + rol-6(su1006)] IV; him-5(e1490) V	S	SS	LLTU	TTTT	UTLL	SS
plx-1(mf160ev724) jcIs1 [ajm-1::GFP + unc-29 (+) + rol-6(su1006)] IV; him-5(e1490) V	S	SS	LLTU	TTTT	UTLL	SS
plx-1(mf160ev724) jcIs1 [ajm-1::GFP + unc-29 (+) + rol-6(su1006)] IV; him-5(e1490) V	S	SS	LLTU	TTTT	UTLL	SS
plx-1(mf160ev724) jcIs1 [ajm-1::GFP + unc-29 (+) + rol-6(su1006)] IV; him-5(e1490) V	S	SS	LLTU	TTTT	UTLL	SS
plx-1(mf160ev724) jcIs1 [ajm-1::GFP + unc-29 (+) + rol-6(su1006)] IV; him-5(e1490) V	S	SS	LLTU	TTTT	UTLL	SS
plx-1(mf160ev724) jcIs1 [ajm-1::GFP + unc-29 (+) + rol-6(su1006)] IV; him-5(e1490) V	S	SS	LLTU	TTTT	UTLL	SS
plx-1(mf160ev724) jcIs1 [ajm-1::GFP + unc-29 (+) + rol-6(su1006)] IV; him-5(e1490) V	S	SS	LLTU	TTTT	UTLL	SS
plx-1(mf160ev724) jcIs1 [ajm-1::GFP + unc-29 (+) + rol-6(su1006)] IV; him-5(e1490) V	S	SS	LLTU	TTTT	UTLL	SS
plx-1(mf160ev724) jcIs1 [ajm-1::GFP + unc-29 (+) + rol-6(su1006)] IV; him-5(e1490) V	S	SS	LLTU	TTTT	UTLL	SS
plx-1(mf160ev724) jcIs1 [ajm-1::GFP + unc-29 (+) + rol-6(su1006)] IV; him-5(e1490) V	S	SS	LLTU	TTTT	UTLL	SS
plx-1(mf160ev724) jcIs1 [ajm-1::GFP + unc-29 (+) + rol-6(su1006)] IV; him-5(e1490) V	S	SS	LLTU	TTTT	UTLL	SS
plx-1(mf160ev724) jcIs1 [ajm-1::GFP + unc-29 (+) + rol-6(su1006)] IV; him-5(e1490) V	SS	SS	LLTU	TTTT	UTLL	SS
plx-1(mf160ev724) jcIs1 [ajm-1::GFP + unc-29 (+) + rol-6(su1006)] IV; him-5(e1490) V	SS	SS	LLTU	TTTT	UTLL	SS
plx-1(mf160ev724) jcIs1 [ajm-1::GFP + unc-29 (+) + rol-6(su1006)] IV; him-5(e1490) V	SS	SS	LLTU	TTTT	UTLL	SS
plx-1(mf160ev724) jcIs1 [ajm-1::GFP + unc-29 (+) + rol-6(su1006)] IV; him-5(e1490) V	SS	SS	LLTU	TTTT	UTLL	SS
plx-1(mf160ev724) jcIs1 [ajm-1::GFP + unc-29 (+) + rol-6(su1006)] IV; him-5(e1490) V	SS	SS	LLTU	TTTT	UTLL	SS
plx-1(mf160ev724) jcIs1 [ajm-1::GFP + unc-29 (+) + rol-6(su1006)] IV; him-5(e1490) V	SS	SS	LLTU	TTTT	UTLL	SS
plx-1(mf160ev724) jcIs1 [ajm-1::GFP + unc-29 (+) + rol-6(su1006)] IV; him-5(e1490) V	SS	SS	LLTU	TTTT	UTLL	SS
plx-1(mf160ev724) jcIs1 [ajm-1::GFP + unc-29 (+) + rol-6(su1006)] IV; him-5(e1490) V	SS	SS	LLTU	TTTT	UTLL	SS
plx-1(mf160ev724) jcIs1 [ajm-1::GFP + unc-29 (+) + rol-6(su1006)] IV; him-5(e1490) V	SS	SS	LLTU	TTTT	UTLL	SS
plx-1(mf160ev724) jcIs1 [ajm-1::GFP + unc-29 (+) + rol-6(su1006)] IV; him-5(e1490) V	SS	SS	LLTU	TTTT	SS	SS
plx-1(mf160ev724) jcIs1 [ajm-1::GFP + unc-29 (+) + rol-6(su1006)] IV; him-5(e1490) V	SS	SS	LLTU	TTTT	UTLL	SS
plx-1(mf160ev724) jcIs1 [ajm-1::GFP + unc-29 (+) + rol-6(su1006)] IV; him-5(e1490) V	SS	SS	LLTU	TTTT	UTLL	SS
plx-1(mf160ev724) jcIs1 [ajm-1::GFP + unc-29 (+) + rol-6(su1006)] IV; him-5(e1490) V	SS	SS	LLTU	TTTT	UTLL	SS
plx-1(mf160ev724) jcIs1 [ajm-1::GFP + unc-29 (+) + rol-6(su1006)] IV; him-5(e1490) V	SS	SS	LLTU	TTTT	SS	SS
plx-1(mf160ev724) jcIs1 [ajm-1::GFP + unc-29 (+) + rol-6(su1006)] IV; him-5(e1490) V	SS	SS	LLTU	TTTT	UTLLU	SS
plx-1(mf160ev724) jcIs1 [ajm-1::GFP + unc-29 (+) + rol-6(su1006)] IV; him-5(e1490) V	SS	SS	LLTU	TTTT	UTLL	SS
plx-1(mf160ev724) jcIs1 [ajm-1::GFP + unc-29 (+) + rol-6(su1006)] IV; him-5(e1490) V	SS	SS	LLLTU	TTTT	UTLL	SS
plx-1(mf160ev724) jcIs1 [ajm-1::GFP + unc-29 (+) + rol-6(su1006)] IV; him-5(e1490) V	SS	SS	LLTU	TTTT	ULL**	SS	Missing 2 cells
plx-1(mf160ev724) jcIs1 [ajm-1::GFP + unc-29 (+) + rol-6(su1006)] IV; him-5(e1490) V	SS	SS	LLTU	TTTT	UTLL	SS
plx-1(mf160ev724) jcIs1 [ajm-1::GFP + unc-29 (+) + rol-6(su1006)] IV; him-5(e1490) V	SS	SS	LLTU	TTTT	UTLL	SS
plx-1(mf160ev724) jcIs1 [ajm-1::GFP + unc-29 (+) + rol-6(su1006)] IV; him-5(e1490) V	SS	SS|Big gap|	LLTU	TTTT	UTLL	SS
plx-1(mf160ev724) jcIs1 [ajm-1::GFP + unc-29 (+) + rol-6(su1006)] IV; him-5(e1490) V	SS	SS	LLTU	TTTT	UTLL	SS
plx-1(mf160ev724) jcIs1 [ajm-1::GFP + unc-29 (+) + rol-6(su1006)] IV; him-5(e1490) V	SS	SS	LLTU	TTTT	SS	SS
plx-1(mf160ev724) jcIs1 [ajm-1::GFP + unc-29 (+) + rol-6(su1006)] IV; him-5(e1490) V	SS	SS	LLTU	TTTT	UTLL	SS
plx-1(mf160ev724) jcIs1 [ajm-1::GFP + unc-29 (+) + rol-6(su1006)] IV; him-5(e1490) V	SS	SS	LLTU	TTTT	UTLL	SS
plx-1(mf160ev724) jcIs1 [ajm-1::GFP + unc-29 (+) + rol-6(su1006)] IV; him-5(e1490) V	SS	SS	LLTU	TTTT	UTLL	SS
plx-1(mf160ev724) jcIs1 [ajm-1::GFP + unc-29 (+) + rol-6(su1006)] IV; him-5(e1490) V	SS	SS	LLTU	TTTT	UTLL	SS
plx-1(mf160ev724) jcIs1 [ajm-1::GFP + unc-29 (+) + rol-6(su1006)] IV; him-5(e1490) V	SS	SS	LLTU	TTTT	UTLL	SS
plx-1(mf160ev724) jcIs1 [ajm-1::GFP + unc-29 (+) + rol-6(su1006)] IV; him-5(e1490) V	SS	SS	LLTU	TTTT	UTLL	SS
plx-1(mf160ev724) jcIs1 [ajm-1::GFP + unc-29 (+) + rol-6(su1006)] IV; him-5(e1490) V	SS	SS	LLTU	TTTT	UTLL	SS
plx-1(mf160ev724) jcIs1 [ajm-1::GFP + unc-29 (+) + rol-6(su1006)] IV; him-5(e1490) V	SS	SS	LLTU	TTTT	UTLL	SS
plx-1(mf160ev724) jcIs1 [ajm-1::GFP + unc-29 (+) + rol-6(su1006)] IV; him-5(e1490) V	SS	SS	LLTU	TTTT	UTLL	SS
plx-1(mf160ev724) jcIs1 [ajm-1::GFP + unc-29 (+) + rol-6(su1006)] IV; him-5(e1490) V	SS	SS	LLTU	TTTT	UTLL	SS
plx-1(mf160ev724) jcIs1 [ajm-1::GFP + unc-29 (+) + rol-6(su1006)] IV; him-5(e1490) V	SS	SS	LLTU	TTTT	UTLL	SS
plx-1(mf160ev724) jcIs1 [ajm-1::GFP + unc-29 (+) + rol-6(su1006)] IV; him-5(e1490) V	SS	SS	LLTU	TTTT	UTLL	SS
plx-1(mf160ev724) jcIs1 [ajm-1::GFP + unc-29 (+) + rol-6(su1006)] IV; him-5(e1490) V	SS	SS	LLTU	TTTT	UTLL	SS
plx-1(mf160ev724) jcIs1 [ajm-1::GFP + unc-29 (+) + rol-6(su1006)] IV; him-5(e1490) V	SS	SS	LLTU	TTTT	UTLL	SS
plx-1(mf160ev724) jcIs1 [ajm-1::GFP + unc-29 (+) + rol-6(su1006)] IV; him-5(e1490) V	SS	SS	LLTU	TTTT	UTLL	SS
plx-1(mf160ev724) jcIs1 [ajm-1::GFP + unc-29 (+) + rol-6(su1006)] IV; him-5(e1490) V	SS	SS	LLTU	TTTT	UTLL	SS
plx-1(mf160ev724) jcIs1 [ajm-1::GFP + unc-29 (+) + rol-6(su1006)] IV; him-5(e1490) V	SS	SS	LLTU	TTTT	UTLL	SS
plx-1(mf160ev724) jcIs1 [ajm-1::GFP + unc-29 (+) + rol-6(su1006)] IV; him-5(e1490) V	SS	SS	LLTU	TTTT	UTLL	SS
plx-1(mf160ev724) jcIs1 [ajm-1::GFP + unc-29 (+) + rol-6(su1006)] IV; him-5(e1490) V	SS	SS	LLTU	TTTT	UTLL	SS
plx-1(mf160ev724) jcIs1 [ajm-1::GFP + unc-29 (+) + rol-6(su1006)] IV; him-5(e1490) V	SS	SS	LLTU	TTTT	UTLL	SS
plx-1(mf160ev724) jcIs1 [ajm-1::GFP + unc-29 (+) + rol-6(su1006)] IV; him-5(e1490) V	SS	SS	LLTU	TTTT	UTLL	SS
plx-1(mf160ev724) jcIs1 [ajm-1::GFP + unc-29 (+) + rol-6(su1006)] IV; him-5(e1490) V	SS	SS	LLTU	TTTT	UTLL	SS
plx-1(mf160ev724) jcIs1 [ajm-1::GFP + unc-29 (+) + rol-6(su1006)] IV; him-5(e1490) V	SS	SS	LLTU	TTTT	UTLL	SS
plx-1(mf160ev724) jcIs1 [ajm-1::GFP + unc-29 (+) + rol-6(su1006)] IV; him-5(e1490) V	SS	SS	LLTU	TTTT	UTLL	SS
plx-1(mf160ev724) jcIs1 [ajm-1::GFP + unc-29 (+) + rol-6(su1006)] IV; him-5(e1490) V	SS	SS	LLTU	TTTT	UTLL	SS
plx-1(mf160ev724) jcIs1 [ajm-1::GFP + unc-29 (+) + rol-6(su1006)] IV; him-5(e1490) V	SS	SS	LLTU	TTTT	UTLL	SS
plx-1(mf160ev724) jcIs1 [ajm-1::GFP + unc-29 (+) + rol-6(su1006)] IV; him-5(e1490) V	SS	SS	LLTU	TTTT	UTLL	SS
plx-1(mf160ev724) jcIs1 [ajm-1::GFP + unc-29 (+) + rol-6(su1006)] IV; him-5(e1490) V	SS	SS	LLTU	TTTT	UTLL	SS
plx-1(mf160ev724) jcIs1 [ajm-1::GFP + unc-29 (+) + rol-6(su1006)] IV; him-5(e1490) V	SS	SS	LLTU	TTTT	UTLL	SS
plx-1(mf160ev724) jcIs1 [ajm-1::GFP + unc-29 (+) + rol-6(su1006)] IV; him-5(e1490) V	SS	SS	LLTU	TTTT	UTLL	SS
plx-1(mf160ev724) jcIs1 [ajm-1::GFP + unc-29 (+) + rol-6(su1006)] IV; him-5(e1490) V	SS	SS	LLTU	TTTT	SS	SS
plx-1(mf160ev724) jcIs1 [ajm-1::GFP + unc-29 (+) + rol-6(su1006)] IV; him-5(e1490) V	SS	SS	LLTU	TTTT	UTLL	SS
plx-1(mf160ev724) jcIs1 [ajm-1::GFP + unc-29 (+) + rol-6(su1006)] IV; him-5(e1490) V	SS	SS	LLTU	TTTT	UTLL	SS
